1     **Cryo-EM structures reveal multiple stages of bacterial outer membrane protein folding**

2

3     Matthew Thomas Doyle<sup>#,1</sup>, John R. Jimah<sup>#,2</sup>, Jenny E. Hinshaw<sup>\*,2</sup>, Harris D. Bernstein<sup>\*,1</sup>

4

5     <sup>#</sup>Equal Contribution

6

7     <sup>\*</sup>Corresponding Authors:

8     Harris D. Bernstein. Email: [harris\\_bernstein@nih.gov](mailto:harris_bernstein@nih.gov)

9     Jenny E. Hinshaw. Email: [jenny.hinshaw@nih.gov](mailto:jenny.hinshaw@nih.gov)

10

11    Departments / Addresses:

12    <sup>1</sup>Genetics and Biochemistry Branch, National Institute of Diabetes and Digestive and Kidney  
13    Diseases, National Institutes of Health, Bethesda, MD 20892 USA

14    <sup>2</sup>Laboratory of Cell and Molecular Biology, National Institute of Diabetes and Digestive and  
15    Kidney Diseases, National Institutes of Health, Bethesda, MD 20892 USA

16

17

18 **SUMMARY**

19 Transmembrane  $\beta$ -barrel proteins are folded into the outer membrane (OM) of Gram-negative  
20 bacteria by the  $\beta$ -barrel assembly machine (BAM) via an unexplained process that occurs  
21 without known external energy sources. Here we used single-particle cryo-EM to visualize the  
22 folding dynamics of a model  $\beta$ -barrel protein (EspP) by BAM. We found that BAM binds the  
23 highly conserved “ $\beta$ -signal” motif of EspP to correctly orient  $\beta$ -strands in the OM during folding.  
24 We also found that the folding of EspP proceeds via remarkable “hybrid-barrel” intermediates in  
25 which membrane integrated  $\beta$ -sheets are attached to the essential BAM subunit, BamA. The  
26 structures show an unprecedented deflection of the membrane surrounding the EspP  
27 intermediates and suggest that  $\beta$ -sheets progressively fold towards BamA to form a  $\beta$ -barrel.  
28 Along with *in vivo* experiments that tracked  $\beta$ -barrel folding while the OM tension was modified,  
29 our results support a model in which BAM harnesses OM elasticity to accelerate  $\beta$ -barrel  
30 folding.

31

32 **KEYWORDS**

33 membrane protein folding, membrane dynamics, outer membrane protein, BAM,  $\beta$ -barrel.

34

## 35 INTRODUCTION

36 The insertion and folding of integral membrane proteins involves fundamentally complex  
37 processes that require management of hydrophobic and hydrophilic interfaces during  
38 intermediate steps to arrive at a topologically correct and functional structure. The biogenesis of  
39 proteins located in the outer membrane (OM) of Gram-negative bacteria and organelles of  
40 bacterial origin that span the membrane via a unique “ $\beta$ -barrel” structure is especially enigmatic,  
41 in part because they rapidly insert into the OM in the absence of known external energy sources  
42 (Horne et al., 2020; Tomasek and Kahne, 2021). For unknown reasons, almost all bacterial outer  
43 membrane proteins (OMPs) contain a transmembrane  $\beta$ -barrel. Although they can vary greatly in  
44 size (8 – 36  $\beta$ -strands) and can be linked to soluble domains, transmembrane  $\beta$ -barrels generally  
45 conform to common architectural rules (Gruss et al., 2013; Horne et al., 2020; Lauber et al.,  
46 2018; Schulz, 2000). OMP  $\beta$ -barrels are tilted amphipathic anti-parallel  $\beta$ -sheets that are closed  
47 by tight hydrogen-bonding between the first and last  $\beta$ -strands (the “ $\beta$ -seam”) into super-stable  
48 cylinders (Horne et al., 2020; Schulz, 2000). Transmembrane  $\beta$ -barrels are also stabilized in the  
49 OM by parallel “girdles” of membrane-facing aromatic residues (Schulz, 2000). The majority  
50 (77%) of  $\beta$ -barrels also have a highly conserved C-terminal motif called the “ $\beta$ -signal” that  
51 contains an essential terminal phenylalanine residue of unknown function (Struyve et al., 1991;  
52 Wang et al., 2021). In bacteria, the assembly (folding and integration) of  $\beta$ -barrels is catalyzed  
53 by a heterooligomer called the  $\beta$ -barrel assembly machine (BAM) (Heinz and Lithgow, 2014;  
54 Heinz et al., 2015; Wu et al., 2005). In *E. coli*, BAM is composed of an essential subunit  
55 (BamA), and four lipoproteins (BamBCDE) (Wu et al., 2005). BamA is conserved in all Gram-  
56 negative bacteria, and essential homologs are also found in mitochondria and chloroplasts (Heinz  
57 and Lithgow, 2014; Kozjak et al., 2003; Patel et al., 2008; Voulhoux et al., 2003). BamD is

58 likewise highly conserved throughout bacteria but is conditionally essential (Anwari et al., 2012;  
59 Hart et al., 2020; Hart and Silhavy, 2020). BamA is itself an OMP that contains a C-terminal  $\beta$ -  
60 barrel domain and five soluble N-terminal polypeptide transport-associated (POTRA) domains  
61 that bind the lipoproteins (Gu et al., 2016; Han et al., 2016; Iadanza et al., 2016).

62         The structural dynamics that occur as OMPs transition from an incompletely folded state  
63 to a fully folded  $\beta$ -barrel remain unclear. However, available evidence suggests that OMP  $\beta$ -  
64 signals may be recognized by BAM and that the unusual conformational malleability of BAM  
65 (particularly BamA) may facilitate the folding process (Doerner and Sousa, 2017; Doyle and  
66 Bernstein, 2019; Hagan et al., 2015; Iadanza et al., 2016; Kaur et al., 2021; Lundquist et al.,  
67 2018; Noinaj et al., 2014; Tomasek et al., 2020; White et al., 2021). Interestingly, BamA does  
68 not contain a canonical  $\beta$ -signal at its C-terminus, but instead has a “kinked” structure that causes  
69 its terminal residues to move dynamically and generate a unique unstable  $\beta$ -seam (that forms  
70 hydrogen-bonds poorly) (Lundquist et al., 2018; Noinaj et al., 2013). BamA can also adopt either  
71 inward-open or outward-open conformational states (in which the BamA  $\beta$ -barrel lumen is open  
72 to the inside of the cell but closed on the surface or *vice versa*) that coincide with the opening  
73 and closing of its  $\beta$ -seam (Gu et al., 2016). Experiments in which the BamA  $\beta$ -seam was tethered  
74 closed by disulfide bonds indicates that the opening and/or closing of BamA is required for  
75 efficient  $\beta$ -barrel folding (Gu et al., 2016; Iadanza et al., 2016; Noinaj et al., 2014). To explain  
76 the requirement for BamA  $\beta$ -seam opening, we recently performed an *in vivo* crosslinking study  
77 that captured a snapshot of the folding process in which the  $\beta$ -signal strand of an incompletely  
78 folded  $\beta$ -barrel was fully paired with BamA  $\beta$ -strand 1 ( $\beta$ 1) via an antiparallel inter-strand  
79 interface to form a remarkable “hybrid-barrel” intermediate folding state (Doyle and Bernstein,  
80 2019). In that study, the opposing interface between the C-terminus of BamA and the N-terminus

81 of the  $\beta$ -barrel substrate was extremely dynamic, which suggests the presence of multiple  
82 transition states during the assembly process (Doyle and Bernstein, 2019). A 4 Å resolution cryo-  
83 electron microscopy (cryo-EM) structure of BAM engaged during the folding of an assembly  
84 deficient BamA deletion mutant (BamA $\Delta$ L1) in detergent micelles also showed BamA $\beta$ 1 bound to  
85 the C-terminus of BamA $\Delta$ L1 to form a late-stage hybrid-barrel intermediate (Tomasek et al.,  
86 2020). Although the structure might depict a similar stage of  $\beta$ -barrel folding, the BAM-  
87 BamA $\Delta$ L1 interface is twisted and results in a “W-shaped” structure that is not fully hybridized  
88 (Tomasek et al., 2020). Due to its non-canonical final structure, it is likely that this transition  
89 state is specific to the assembly of BamA and does not occur during the folding of typical OMPs.  
90 Moreover, the BAM-BamA $\Delta$ L1 structure did not show how BAM recognizes the terminal  
91 phenylalanine in  $\beta$ -signals or reveal the dynamics of the folding process that results in the late  
92 hybrid-barrel state.

93       Mostly because the reconstitution of the native OM *in vitro* remains a significant  
94 technical challenge, the role of the membrane itself in OMP folding has often been neglected.  
95 Unlike other biological membranes, the bacterial OM is an asymmetric bilayer that is composed  
96 of a unique glycolipid known as lipopolysaccharide (LPS) in the outer leaflet and phospholipids  
97 in the inner leaflet (Horne et al., 2020). The concentration of OMPs within the OM is also  
98 extremely high and has been estimated to account for the majority of the OM volume (Horne et  
99 al., 2020; Jaroslowski et al., 2009). Because the interactions between densely packed  $\beta$ -barrels  
100 and LPS molecules results in a rigid structure in which protein diffusion is low (Rassam et al.,  
101 2015; Rojas et al., 2018; Ursell et al., 2012), the mechanism by which  $\beta$ -barrels are folded into  
102 the OM is even more puzzling. A recent study showed that the BAM lipoproteins can alter  
103 membrane fluidity (albeit in synthetic bilayers) and thereby potentially facilitate  $\beta$ -barrel

104 integration (White et al., 2021). Intriguing molecular dynamics simulations have also raised the  
105 possibility that the unique ‘wedge-shaped’ aromatic girdles of the BamA  $\beta$ -barrel might thin the  
106 OM to reduce the energy required for assembly (Liu and Gumbart, 2020; Noinaj et al., 2013).

107         Here, we examined the folding of a model *E. coli* O157:H7 OMP (EspP) that contains a  
108 stably closed  $\beta$ -seam, an average sized  $\beta$ -barrel (12  $\beta$ -strands), and a canonical  $\beta$ -signal (Barnard  
109 et al., 2007; Franklin et al., 2018; Wang et al., 2021). By using single-particle cryo-EM to  
110 analyze an assembly-arrested form of the protein associated with BAM in native-nanodiscs that  
111 contain components directly extracted from the bacterial OM (unlike previous structural studies  
112 that analyzed BAM in detergent or nanodiscs with synthetic phospholipid bilayers), we were able  
113 to visualize multiple intermediate stages of  $\beta$ -barrel folding. Unlike BamA<sub>ΔL1</sub>, EspP forms an  
114 intermediate structure in which its conserved  $\beta$ -signal is fully hybridized with BamA to form a  
115 “B-shaped” hybrid-barrel. The critical phenylalanine residue in the EspP  $\beta$ -signal is positioned  
116 on BAM within an unusual binding pocket that interfaces with the OM to correctly orient the  
117 new OMP during folding. We also obtained direct evidence that BAM alters the structure of the  
118 OM via membrane thinning and interfacial LPS / lipid stabilization. Remarkably, in some of the  
119 intermediate hybrid-barrel structures, the OM around the folding EspP  $\beta$ -barrel was deflected at  
120 an angle relative to the plane of the OM around BamA. This phenomenon is unlike any known  
121 membrane-bending process (Prinz and Hinshaw, 2009). Our structural data, combined with the  
122 results of *in vivo* experiments in which  $\beta$ -barrel assembly was monitored during transient  
123 modulation of OM tension, led us to a completely novel model in which BAM utilizes the  
124 intrinsic structure of  $\beta$ -barrels and the mechanical properties of the OM itself to accelerate the  
125 final stages of OMP folding.

## 126 RESULTS

### 127 Structure of BAM folding a $\beta$ -barrel substrate in native OM nanodiscs

128 To isolate an active form of BAM that is engaged in catalyzing the folding of a new  $\beta$ -barrel, we  
129 utilized a derivative of EspP (<sup>MBP-76</sup>EspP) whose assembly is arrested at a late stage while it is  
130 still bound to BAM (Doyle and Bernstein, 2019, 2021). EspP is a member of the autotransporter  
131 family of OMPs that consist of a C-terminal  $\beta$ -barrel and an N-terminal extracellular  
132 (“passenger”) domain that is translocated across the OM by BamA (Doyle and Bernstein, 2021;  
133 Rossiter et al., 2011). To construct <sup>MBP-76</sup>EspP, we replaced most of the passenger domain with  
134 maltose binding protein (MBP), a protein that folds rapidly in the periplasm (the space between  
135 the inner membrane and OM) and, consequently, prevents translocation due to the size  
136 constraints of the channel (Doyle and Bernstein, 2019). Because translocation must be completed  
137 before BamA releases a fully folded EspP  $\beta$ -barrel (Ieva and Bernstein, 2009; Ieva et al., 2011),  
138 <sup>MBP-76</sup>EspP remains bound to BamA in a hybrid-barrel state in which the  $\beta$ -signal is fully  
139 hybridized to BamA $\beta$ 1 (Doyle and Bernstein, 2019). Importantly, BAM-<sup>MBP-76</sup>EspP co-  
140 complexes represent *bona fide* folding intermediates because  $\beta$ -barrel folding can be completed  
141 when the MBP containing portion of <sup>MBP-76</sup>EspP is released by proteolysis (Doyle and Bernstein,  
142 2019, 2021). To increase stability during purification, we used an *E. coli* strain transformed with  
143 plasmids expressing HisBamA<sub>S425C</sub>BCDE and <sup>MBP-76</sup>EspP<sub>S1299C</sub> and generated a disulfide-tether  
144 between two residues in BamA $\beta$ 1 and the EspP  $\beta$ -signal that were previously shown to be  
145 proximal during the natural hybrid-barrel assembly step *in vivo* (Doyle and Bernstein, 2019). To  
146 more faithfully reconstitute an OM environment than previous structural studies on BAM (or  
147 other OMPs), we used a detergent-free system involving styrene–maleic acid (SMA) copolymers  
148 to directly solubilize and isolate BAM-<sup>MBP-76</sup>EspP co-complexes into native nanodiscs. Based on

149 structural studies on  $\alpha$ -helical membrane proteins, our BAM<sup>-MBP-76</sup>EspP OM-nanodiscs likely  
150 contain locally derived phospholipids and LPS (Lee et al., 2016; Sun et al., 2018). Purified  
151 BAM<sup>-MBP-76</sup>EspP OM-nanodiscs contained lipoproteins in the correct stoichiometry (Figure 1A).  
152 The BamA<sup>-MBP-76</sup>EspP hybrid-barrel exhibited an intrinsic feature of  $\beta$ -barrels when examined  
153 by SDS-PAGE in that in the absence of heat it was resistant to unfolding by SDS and migrated  
154 more rapidly (Doyle and Bernstein, 2019; Noinaj et al., 2015). Furthermore, the rapidly  
155 migrating BamA<sup>-MBP-76</sup>EspP hybrid-barrels also ran as diffuse bands (Figure 1A, left lane) that  
156 presumably resulted from dynamic interactions between the EspP  $\beta$ -barrel N-terminal strand and  
157 BamA C-terminal strands that were previously observed during folding *in vivo* (Doyle and  
158 Bernstein, 2019).

159         A high-resolution structure of the purified BAM<sup>-MBP-76</sup>EspP OM-nanodiscs was solved to  
160 a global resolution of 3.6 Å by single particle cryo-EM (Figure 1B & Figure S1). The structure  
161 revealed BamA in an overall outward-open conformation with BamA $\beta$ 1 associated with the EspP  
162  $\beta$ -signal to form a hybrid-barrel intermediate folding state (Figure 1B). In this map only four C-  
163 terminal  $\beta$ -strands of the actively folding EspP  $\beta$ -barrel were clearly resolved. These  $\beta$ -strands  
164 extended into a low-resolution region within the OM-nanodisc that likely represents the  
165 remainder of the amphipathic EspP  $\beta$ -barrel creating a border between the membrane and an  
166 internal hydrophilic cavity (Figure 1C). The low resolution of the EspP  $\beta$ -barrel N-terminus  
167 suggests that this portion of the protein transitions between multiple highly dynamic folding  
168 substates, a notion consistent with the previously observed dynamic interface between the EspP  
169  $\beta$ -barrel N-terminus and BamA $\beta$ 15/16 mentioned above (Doyle and Bernstein, 2019).

170         Comparison of our structure to the BAM-BamA $\Delta$ L1 structure (Tomasek and Kahne, 2021)  
171 showed striking differences. While the hybridization interface between BAM and the BamA $\Delta$ L1



172 mutant is twisted to form a W-shaped hybrid-barrel, the BamA-EspP hybridization interface  
173 instead forms a continuous flat  $\beta$ -sheet (Figure 1D). This difference stems from the ability of  
174 BamA $\beta$ 1/2 to flex and tilt in the membrane and suggests a mechanism by which BamA can  
175 accommodate the folding and integration of different  $\beta$ -barrel substrates. In the BAM-<sup>MBP-76</sup>EspP  
176 structure, BamA POTRA3 and BamB (through its association with POTRA3) are also positioned  
177 closer to the membrane (Figure 1D “P3” & Figure S1). Conformational changes localized near  
178 the N-terminal  $\alpha$ -helices of BamD likewise result in a shift towards the membrane with  $\alpha$ -helix 2  
179 interfacing with the outer side of the periplasmic turns of the folding EspP  $\beta$ -barrel (Figure 1D &  
180 Figure S1). This overall conformation contrasts with the BAM-BamA $\Delta$ L1 structure in which  
181 BamD is positioned beneath the lumen of BamA $\Delta$ L1. To test whether BamD can interact with the  
182 periplasmic turns of EspP during a hybrid-barrel stage of assembly *in vivo*, BAM containing a  
183 BamD<sub>R49C</sub> subunit was co-expressed in *E. coli* with <sup>MBP-76</sup>EspP<sub>D1218C</sub> (cysteine substitution sites  
184 are indicated in Figure 1D) and cells were treated with a thiol-specific disulfide-oxidation  
185 catalyst. Consistent with our structure, strong disulfide-crosslinking between <sup>MBP-76</sup>EspP<sub>D1218C</sub>  
186 and BamD<sub>R49C</sub> was observed after chemical oxidation but not in the control strain expressing a  
187 wild type (WT) BamD allele (Figure 1E). The observation that crosslinking plateaued at ~40%  
188 suggests the presence of additional substates with alternative conformations of EspP relative to  
189 BamD (Figure 1E plot & Figure S1). A higher than expected level of spontaneous crosslinking  
190 (~10%, Figure 1E, Ox-) also indicated the existence of a stage in which EspP interacts with  
191 BamD very stably.

192 Strikingly, in the BAM-<sup>MBP-76</sup>EspP structure we were able to clearly resolve the  
193 conserved residues of the canonical  $\beta$ -signal of EspP (Figure 1B & 1F). The terminal EspP  $\beta$ -  
194 signal residue (F1300) is oriented over BamA $\beta$ 1 in a space created by BamA<sub>G424</sub> that forms a

195 novel structural arrangement reminiscent of stabilizing intra-barrel “mortise-tenon joints”  
196 (Figure 1F & 1G) (Leyton et al., 2014). BAM interacts with F1300 via BamA T423, G424, F426,  
197 and Q446 within an unusual membrane facing hydrophobic pocket (Figure 1F). Nevertheless, the  
198  $\beta$ -signal binding pocket is not totally filled. Presumably this property enables BAM to  
199 accommodate the less common subset of OMPs that have  $\beta$ -signals terminated by tryptophan or  
200 tyrosine instead of phenylalanine (Struyve et al., 1991; Wang et al., 2021). The conserved  $\beta$ -  
201 signal residue at the -3 position of EspP (Y1298) interacts with BamD L124 and is oriented into  
202 the membrane plane at a depth corresponding to the aromatic girdles of fully folded canonical  $\beta$ -  
203 barrels (Figure 1F). Overall, the structure suggests that BAM binds to  $\beta$ -signals to correctly  
204 orient the C-terminal strands of new OMPs into the OM during the folding process. Interestingly,  
205 darobactin (a recently discovered BAM inhibitor) (Imai et al., 2019) and the  $\beta$ -signal interact  
206 with BamA $\beta$ 1 in a highly similar way; like EspP F1300, the terminal phenylalanine of the  
207 darobactin peptide is positioned over BamA<sub>G424</sub> (Kaur et al., 2021) (Figure 1G). Therefore, our  
208 structure not only provides the structural basis for native OMP  $\beta$ -signal binding by BAM during  
209 assembly, but also definitively shows that darobactin is a competitive inhibitor of OMP substrate  
210 recognition and thereby helps to explain its bactericidal potency.

211 An important aspect of our study is that by solving the structure of BAM-<sup>MBP-76</sup>EspP  
212 within native nanodiscs that harbor local OM lipids captured during solubilization, we can  
213 consider the role of the of the OM in OMP assembly. In our BAM-<sup>MBP-76</sup>EspP map, we observed  
214 a repetitive pattern of stabilized density circling the BamA  $\beta$ -barrel at the expected location and  
215 size of outer leaflet LPS lipid A head groups and clear boundaries that likely represent density  
216 for inner leaflet phospholipid headgroups (Figure 2A left & middle). It has been postulated that  
217 BamA locally thins the OM to decrease the energetic penalty of OMP integration (Liu and

218 Gumbart, 2020; Noinaj et al., 2013). To test this hypothesis, we measured the membrane  
219 thickness at positions that had clear and repeatable density proximal to BamA (Figure 2A right &  
220 Figure S2). The membrane near the N-terminal half of the BamA  $\beta$ -barrel ( $\sim\beta 1 - \beta 7$ ) is  $\sim 25 - 26$   
221  $\text{\AA}$  in width. This value corresponds closely to the estimated average thickness of the OM ( $\sim 25 \text{\AA}$ )  
222 (Wu et al., 2014) and is slightly thicker than the average hydrophobic region of OMPs ( $\sim 24 \text{\AA}$ )  
223 (Lomize et al., 2011). Interestingly, the side of the OM-nanodiscs near strands  $\beta 8 - \beta 13$   
224 exhibited prominent local thinning to a “pinch-point” ( $\sim 20 \text{\AA}$ ) that thickens again near the C-  
225 terminal BamA curl. These observed membrane depth patterns perfectly match recent molecular  
226 dynamics simulations that predict thickening/thinning patterns around BamA (Liu and Gumbart,  
227 2020). The map also suggests even more extreme membrane thinning across strands  $\beta 14 - 16$ ,  
228 but the density does not have clear boundaries for measurement. At the location of the pinch-  
229 point we also observed striking density that likely corresponds to a lipid A moiety with a single  
230 stabilized acyl chain (the other lipid A acyl chains are presumably dynamic) (Figure 2B). The  
231 stabilized acyl chain lies within a groove alongside BamA strands  $\beta 11/12$  that is created by the  
232 lipid-facing residues G631 and A714. Because the membrane thickness and stabilization patterns  
233 observed in the high-resolution BAM-MBP-76EspP structure were likewise observed in our  
234 subsequent independent BAM-MBP-76EspP reconstructions (see below and Figure S2), they are  
235 likely valid structural features. We speculate that the stabilization of lipid acyl chains on the C-  
236 terminal side of BamA is helpful for the process of membrane thinning.

237

238 **The BAM, the OM, and the incoming OMP each undergo major structural transitions**  
239 **during  $\beta$ -barrel folding**

240 To generate the BAM-MBP-76EspP structure described in the preceding section, we started from a  
241 pool of ~1.2M high quality particles generated in RELION and obtained the high-resolution map  
242 after rounds of heterogenous refinement in cryoSPARC. Although our map had a higher global  
243 resolution than the previously solved BAM-BamA<sub>ΔL1</sub> structure, the local resolution was poor in  
244 the area corresponding to the N-terminal portion of the EspP β-barrel and low for BamA P3 /  
245 BamB and the N-terminus of BamD (Figure 3A) presumably due to significant dynamicity in  
246 these regions. During processing we noticed specific low-resolution classes that appeared to have  
247 alternate conformations in these areas and wondered whether a more conservative processing  
248 strategy could improve the local resolution, albeit at the expense of global resolution. To that  
249 end, we reprocessed the entire ~1.2M particle pool in RELION into 6 classes and then separately  
250 processed each class in cryoSPARC yielding reconstructions with global resolutions between 4.2  
251 – 4.5 Å (Figure 3B & Figure S3). The conformation of the BamA β-barrel is essentially identical  
252 in all of the structures (Figure 3C). Classes 3, 4 and 6 are similar to the original high-resolution  
253 structure but contained slight changes in the position of BamB and the N-terminus of BamD. The  
254 density of BamB is poor in class 2 (although it is visible at lower thresholds) presumably because  
255 it is highly dynamic (Figure 3B). Indeed, between all the classes the largest overall BAM  
256 conformational changes were in the positioning of BamB (Figure 3C & Video S1). Classes 1 and  
257 5 represent conformational extremes in which the BamA POTRA domains and BamD move  
258 closer or farther away from each other and, concomitantly, BamA P3 moves towards or away  
259 from the membrane (Figure 3D). Consequently, this results in very significant changes in BamB  
260 positioning (Figure 3D). Together, these reconstructions show that BAM periplasmic  
261 components undergo large conformational changes during the late stages of OMP folding that

262 mimic the structural heterogeneity observed in the periplasmic subunits even in apo-BAM  
263 (Iadanza et al., 2020).

264         The simple classification approach did not improve the maps in the region corresponding  
265 to the folding EspP  $\beta$ -barrel. To better resolve the intermediate folding states of EspP, we  
266 subtracted the signals for BamB, BamA P3, and the BamD N-terminus from the original  $\sim$ 1.2M  
267 particle pool and conducted focused 3D classification and refinement on the remaining complex.  
268 We reasoned that removing these dominant sources of structural heterogeneity would allow  
269 better alignment of the conformational substates of the EspP  $\beta$ -barrel N-terminus during the  
270 hybrid-barrel stage that were predicted from our earlier experiments *in vivo* (Doyle and  
271 Bernstein, 2019). Consistent with our hypothesis, we were able to generate multiple  
272 reconstructions of novel hybrid-barrel substates using this processing strategy (Figure 4 and S3).  
273 In one structure that we designate the “open-sheet” (OS)-state (Figure 4A), the EspP  $\beta$ -barrel is  
274 observed as a remarkable membrane-integrated open  $\beta$ -sheet with its C-terminus hybridized to  
275 BamA. In this state the OM-nanodisc is deflected around the EspP transmembrane  $\beta$ -sheet at an  
276 angle that results in a mismatch of the membrane plane around BamA (Figure 4A). In the  
277 “intermediate-open” (IO)-state (Figure 4B), the reconstructed BAM components are essentially  
278 identical to the OS-state with both structures showing BamA in an outward-open conformation.  
279 However, compared to the OS-state, in the IO-state the EspP transmembrane  $\beta$ -sheet is folded  
280 closer to BamA and the observed membrane deflection is less extreme. In a third structure that  
281 we call the “barrelized/continuous-open” (B/CO)-state, we observed a “B-shaped” BamA-EspP  
282 hybrid-barrel but, unlike the other states, no obvious membrane deflection (Figure 4C). This state  
283 presumably represents a very late stage of EspP assembly in which the  $\beta$ -barrel structure is  
284 nearly complete. In the B/CO-state, BAM is observed in a totally novel conformation in which

285 the C-terminal half of the BamA  $\beta$ -barrel is expanded away from the N-terminus and  
286 repositioned higher in the membrane plane so that its surface loops (including L4, 6, and 7) are  
287 shifted away from the EspP  $\beta$ -barrel (Figure 4D). The result is a BamA structure reminiscent of  
288 outward-open states but with an opening that creates a continuous channel through the OM-  
289 nanodisc (Figure 4D). This structure may represent a stage prior to the release of the EspP  $\beta$ -  
290 barrel that we have recently observed *in vivo* in which the BamA  $\beta$ -barrel facilitates secretion of  
291 the EspP passenger domain (Doyle and Bernstein, 2021).

292

### 293 **Antagonism between the intrinsic structure of OMPs and OM tension drives late folding**

294 Although we cannot definitively order the three hybrid-barrel substates in a temporal sequence  
295 because they are derived from the same sample, a simple interpretation of the data is that the OS-  
296 state represents an early stage of folding following the membrane integration of the EspP  $\beta$ -  
297 sheet, the IO-state represents a slightly later stage in which the EspP  $\beta$ -sheet folds towards BamA  
298 (Figure 4E), and the B/CO-state represents a relatively late stage in which the  $\beta$ -sheet folds into a  
299 barrel-like structure (see Video S2). It is notable that the changes in EspP folding between OS  
300 and IO states were not associated with major structural changes in BamA. Furthermore, the  
301 extreme nature of the expanded EspP  $\beta$ -sheet and membrane deflections in the OS and IO-states  
302 were very surprising and warranted an explanation that places these states in the context of  
303 folding within the native OM.

304 To rationalize our findings, we conceptualized a new model of the late stages of OMP  
305 assembly by considering the intrinsic structure of transmembrane  $\beta$ -barrels and the rigidity of the  
306 OM. OMP  $\beta$ -strands are tilted by  $\sim 45^\circ$  from the barrel-axis (Schulz, 2000) and, due to the  
307 presence of aromatic girdles and other membrane-facing hydrophobic residues in  $\beta$ -barrel

308 transmembrane  $\beta$ -sheets, fully folded OMPs are often slightly tilted in the OM (Lomize et al.,  
309 2012). We calculated the membrane orientations of solved *E. coli*  $\beta$ -barrels and then illustrated  
310 them as open  $\beta$ -sheets while maintaining their  $\beta$ -signals in their calculated positions relative to  
311 the OM plane (Figure 5A right, Figure S4A). The result is a mismatch in which the N-terminal  
312 transmembrane  $\beta$ -strands would not reside in the normal OM plane but would instead deflect the  
313 membrane. Consistent with this hypothetical scenario, the OS and IO-state structures capture  
314 EspP as an incompletely-folded open  $\beta$ -sheet at an angle relative to the normal OM plane  
315 (Figures 4A, 4B, 5B and S4B). Indeed, in all our structures we observe BamA bound to the EspP  
316  $\beta$ -signal at an even higher angle than the  $\beta$ -signal is situated in after EspP is completely folded  
317 ( $\sim 64.6^\circ$  vs.  $58^\circ$ , Figure 5A, 5B, & Figure S4B). Furthermore, the difference between the angle of  
318 the  $\beta$ -signal of some OMPs when bound to BamA as an open  $\beta$ -sheet versus the fully folded  
319 form may be even greater (Figure S4A, see PgaA). The outward-open BamA conformation  
320 might therefore create a highly antagonistic scenario between the normal OM plane and the  
321 intrinsic structure of incompletely folded  $\beta$ -barrels that deflects the membrane (Figure 4A, 4B,  
322 5B). This scenario, however, should be considered in light of the finding that unlike other  
323 biological membranes, the OM forms a very rigid structure (stiffer than the peptidoglycan cell  
324 wall) due to interactions between LPS molecules, the high OMP density, and the stiffness of  
325 OMPs themselves (Horne et al., 2020; Jaroslowski et al., 2009; Lessen et al., 2018; Rojas et al.,  
326 2018). Indeed, due to its rigidity, the OM has been observed to function as a ‘spring’ that  
327 undergoes compressive changes during osmotic shock (Rojas et al., 2018). Although stretching  
328 and compressive forces appear to be globally equalized across the *E. coli* OM during steady-state  
329 growth (Rojas et al., 2018), our model predicts that the intrinsic structure of hybrid-barrel

330 deflected  $\beta$ -sheets (Figure 4A, 4B) would be countered by the intrinsic local tensile forces of the  
331 OM to help drive the closure of  $\beta$ -barrels (Figure 5B).

332 To test our model *in vivo*, we expressed <sup>MBP-76</sup>EspP alongside BAM in *E. coli* to create a  
333 pool of BamA-<sup>MBP-76</sup>EspP hybrid-barrels in the OM and then subsequently monitored late-stage  
334  $\beta$ -barrel folding kinetics during modification of OM tension via osmotic shock. As mentioned  
335 earlier, the assembly of <sup>MBP-76</sup>EspP can be restarted from the hybrid-barrel stage by adding a  
336 protease that removes the MBP portion responsible for arresting assembly. Completion of  
337 folding can then be assessed by monitoring the auto-catalytic cleavage of the passenger domain  
338 that occurs after it is fully secreted and the  $\beta$ -barrel reaches its native conformation (Dautin et al.,  
339 2007; Ieva and Bernstein, 2009). Consistent with previous studies (Doyle and Bernstein, 2019,  
340 2021), adding proteinase K (PK) to bacteria suspended in isotonic LB medium released ~30 kDa  
341 C-terminal EspP fragments from the fusion protein that were rapidly converted into folded ~27  
342 kDa  $\beta$ -barrels and a peptide derived from the passenger domain that was not detected (Figure 5C  
343 top-left and black curve). However, when bacteria were exchanged into a hypertonic LB medium  
344 to relax the OM (Rojas et al., 2018) prior to the addition of PK, the incompletely folded C-  
345 terminal EspP fragments accumulated and the rate of their conversion to fully folded  $\beta$ -barrels  
346 was significantly reduced (Figure 5C bottom-left and blue curve). Although the  $\beta$ -barrel  
347 assembly delay under hypertonic conditions was most notable at 5 min after PK addition, by 20  
348 min there was no difference in the level of folded  $\beta$ -barrel between the two conditions (Figure  
349 5C). This observation strongly suggests that the delay was due to an energetic effect and that the  
350 hypertonic conditions did not simply block completion of  $\beta$ -barrel folding. To directly pinpoint  
351 the delay to the period that follows the formation of the hybrid-barrel but that precedes the  
352 completion of EspP  $\beta$ -barrel folding, the experiment was repeated using the strain expressing



353 HisBamA<sub>S425C</sub>BCDE and MBP-<sup>76</sup>EspP<sub>S1299C</sub>. Samples were treated with PK for 5 min (or mock-  
354 treated) and oxidized to promote disulfide-crosslinking as described above. Consistent with  
355 previous results (Doyle and Bernstein, 2019), strong crosslinks between BamAβ1 and the MBP-  
356 <sup>76</sup>EspP β-signal were detected in oxidized samples without PK treatment (Figure 5D, lanes 3 and  
357 6). In samples that were both oxidized and PK treated, the incompletely folded EspP C-terminal  
358 fragments were likewise crosslinked to BamA (Figure 5D, lanes 2 and 5, black arrows). These  
359 results confirm that hypertonic conditions do not interfere with the stability of the BamA-MBP-  
360 <sup>76</sup>EspP assembly intermediate and pinpoint the delay to the period following the formation of the  
361 hybrid-barrel. Interestingly, EspP C-terminal fragments crosslinked to BamA at a statistically  
362 higher level under hypertonic conditions at the 5 min time-point (Figure 5D, graph). This finding  
363 suggests that the association of incompletely folded EspP with BamA at the hybrid-barrel stage  
364 is prolonged when the OM is relaxed.

365 Finally, our model not only predicts that folding can be slowed by relaxing the OM, but  
366 that folding can be accelerated by increasing the OM tension. To test this idea, we repeated the  
367 assembly restart experiment again under hypertonic conditions, but 5 min after the addition of  
368 PK we exchanged the bacteria into an equivalent solution (control) or a hypotonic solution (to  
369 increase OM tension) and continued to monitor EspP β-barrel folding. Consistent with our  
370 hypothesis, the EspP C-terminal fragments were converted more rapidly into folded β-barrels  
371 when they were exchanged into a hypotonic medium (Figure 5E). The difference constitutes a  
372 substantial effect given that only a small fraction of incompletely folded EspP molecules  
373 remained to be tracked after the 5 min time-point. Together, these results support a model in  
374 which BamA orients OMP substrates at an antagonistic angle to the OM to exploit the intrinsic  
375 tension of the OM as a useful driving force to accelerate β-barrel folding (Figure 5B).

376 **DISCUSSION**

377 Although the first transmembrane  $\beta$ -barrel structure was solved in 1990 (Weiss et al., 1990), how  
378 they are recognized, folded, and released into the bacterial OM in the absence of any known  
379 external energy sources remains poorly understood. In this work we provide structural and  
380 biochemical evidence that helps to explain all of these critical stages of OMP assembly. We  
381 solved ten distinct cryo-EM structures of BAM bound to EspP, a model OMP that contains  
382 conserved features found in most transmembrane  $\beta$ -barrels, that likely illustrate distinct  
383 intermediate stages in the folding process. Because the co-complex was purified in native  
384 nanodiscs instead of detergent or nanodiscs containing synthetic phospholipid bilayers, we were  
385 able to obtain insight into how OM lipids contribute to the  $\beta$ -barrel folding process. With respect  
386 to substrate recognition, our structural data reveal an unusual pocket in BAM that binds to the  
387 highly conserved C-terminal OMP  $\beta$ -signal motif. During the hybrid-barrel intermediate stage,  
388 the terminal aromatic residue interacts with several adjacent BAM residues and is positioned  
389 over the space created by BamA<sub>G424</sub>. The interaction resembles G-(F/Y/W)-based inter-strand  
390 mortise-tenon joints that are found within most OMPs and that provide structural stability  
391 (Leyton et al., 2014). However, the BamA- $\beta$ -signal interaction constitutes the first observation of  
392 an inter-barrel mortise-tenon-like joint. The binding of BAM to the  $\beta$ -signal provides an  
393 explanation for the finding that mutations of the terminal aromatic residue cause severe assembly  
394 defects and lead to OMP degradation *in vivo* (Gessmann et al., 2014; Lee et al., 2018; Wang et  
395 al., 2021). Presumably the mutations reduce the binding affinity of incoming OMPs to BAM,  
396 prevent their progression to the hybrid-barrel stage, and result in exposure to periplasmic  
397 proteases. Our discovery of this binding site may also enable the design of novel competitive  
398 inhibitors of  $\beta$ -signal binding and the further development of lead compounds such as darobactin

399 (Imai et al., 2019; Kaur et al., 2021) that act as potent antibiotics against multidrug-resistant  
400 Gram-negative pathogens.

401 Our results provide evidence that the EspP C-terminal domain inserts into the OM as a  $\beta$ -  
402 sheet and then folds into a  $\beta$ -barrel in multiple steps. The structural data suggest that BAM binds  
403 to the  $\beta$ -signal strand of EspP to form a flat hybridization interface and that this hybrid-barrel  
404 intermediate passes through several substantially different stages of folding (e.g., OS, IO, and  
405 B/CO substates) resulting in a “B-shaped” hybrid-barrel. Ultimately, because the BamA $\beta$ 1-  
406 EspP( $\beta$ -signal) backbone hydrogen-bond network is weaker than that of the  $\beta$ -seam of fully  
407 folded EspP (Figure S4C), this configuration provides an energetically favorable mechanism for  
408 the release of the substrate into the lipid bilayer. Furthermore, we identified a substate in which  
409 BamA exists in a novel continuous-open conformation coinciding with a more barrel-like EspP  
410 structure (the B/CO-state). We recently showed that the unfolded passenger domain of <sup>MBP</sup>-  
411 <sup>76</sup>EspP is secreted through the BamA  $\beta$ -barrel lumen during a hybrid-barrel assembly stage *in*  
412 *vivo* (Doyle and Bernstein, 2021). We therefore speculate that the continuous opening in BamA  
413 observed in the B/CO-state may constitute a channel for the secretion of autotransporter  
414 passenger domains and extracellular segments of other OMPs. Despite the stability of <sup>MBP</sup>-  
415 <sup>76</sup>EspP, we found that the passenger domain is extremely dynamic within the channel *in vivo*  
416 (Doyle and Bernstein, 2021), and this dynamicity may explain the lack of passenger domain  
417 density within the BamA opening in our reconstructions. Alternatively, the conformational  
418 changes observed in the surface loops of BamA in the B/CO-state relative to our other structures  
419 (e.g., L4, 6, and 7) may be required for the folding of  $\beta$ -barrels more generally. Indeed, this  
420 finding may explain why the function of BAM is strongly inhibited when BamA L4 is bound by  
421 the bactericidal antibody fragment Fab1 which presumably prevents this conformational cycling

422 (White et al., 2021). It is important to note that none of our reconstructions exhibited the twisted  
423 interface that results in a hybrid-barrel with a “W-shaped” cross-section observed in the BAM-  
424 BamA $\Delta$ L1 structure (Tomasek et al., 2020). Besides lacking a canonical C-terminal  $\beta$ -signal, the  
425 BamA $\Delta$ L1  $\beta$ -barrel substrate has unique features such as an unstable  $\beta$ -seam, extreme structural  
426 dynamism, and a kinked C-terminus that likely causes the twisted hybridization interface  
427 observed during its assembly (Doerner and Sousa, 2017; Gu et al., 2016; Iadanza et al., 2016;  
428 Lundquist et al., 2018; Noinaj et al., 2014; Noinaj et al., 2013; Tomasek et al., 2020). Therefore,  
429 the W-form hybrid-barrels probably represent a late intermediate stage that is unique to the  
430 assembly of BamA. Because EspP follows the common architectural rules of most  $\beta$ -barrels, we  
431 speculate that the majority of OMPs are folded through a late B-form hybrid-barrel stage before  
432  $\beta$ -signal exchange and  $\beta$ -seam closure causes the release of the fully folded  $\beta$ -barrel.

433 Our structural data also enable us to discriminate among a variety of models for BAM  
434 function that have been previously proposed. We found that during its assembly by BAM, EspP  
435 can associate with BamA to form structurally diverse hybrid-barrels and that in two  
436 reconstructions EspP was observed in remarkable integrated open  $\beta$ -sheet conformations. Based  
437 on these findings we propose a  $\beta$ -barrel folding model in which the open  $\beta$ -sheets close towards  
438 BamA and then curl inwards to form a barrel-like structure at a late stage (Video S2). The  
439 interface between BamA $\beta$ 1 and the EspP  $\beta$ -signal does not change significantly between our ten  
440 structures, yet the N-terminus of the EspP  $\beta$ -barrel undergoes enormous conformational changes.  
441 These observations are fundamentally inconsistent with “threading” models which propose that  
442 unfolded OMPs enter the BamA  $\beta$ -barrel lumen and form  $\beta$ -hairpins that are sequentially  
443 integrated into the lipid bilayer through a “lateral gate” between BamA  $\beta$ 1 and  $\beta$ 16 (Horne et al.,  
444 2020; Tomasek and Kahne, 2021). In contrast, our structures are consistent with our previous

445 study in which we showed that the interface between the BamA C-terminus and the EspP  $\beta$ -  
446 barrel N-terminus is extremely dynamic but that the BamA $\beta$ 1- $\beta$ -signal interface is remarkably  
447 stable during the hybrid-barrel stage *in vivo* (Doyle and Bernstein, 2019). Based on the results,  
448 we proposed that the N-terminus of OMP  $\beta$ -barrels undergo a swinging action in the membrane  
449 during their assembly. In light of our structural data, we speculate that 1) at early stages of  
450 folding OMP  $\beta$ -signals are bound by BamA $\beta$ 1, 2) this interaction templates the folding of the  
451 adjacent OMP  $\beta$ -strands via  $\beta$ -augmentation (Remaut and Waksman, 2006) until an elongated  $\beta$ -  
452 sheet is formed and 3) during the folding process the BamA  $\beta$ -barrel transitions from an inward-  
453 open state to the outward-open state that we observed. The notion of sequential folding supports  
454 the “BamA-elongation” model proposed by Schiffrin *et al* (2017), except that our OS-/IO-  
455 substate structures raise the possibility that  $\beta$ -sheet elongation and OM integration occur  
456 simultaneously. Independent of the role of BamA in OMP assembly, our finding that the  
457 essential but enigmatic BamD subunit can interact with the turns of already integrated but  
458 incompletely folded  $\beta$ -barrels is very striking. It is plausible that BamD supports the assembly  
459 process by sensing the extent of substrate folding or by facilitating  $\beta$ -strand transfer.

460 Finally, our work yielded significant insights into the energetics of OMP assembly. First,  
461 we obtained the first direct experimental evidence that the C-terminal side of the BamA  $\beta$ -barrel  
462 can modify the thickness of the membrane and therefore lower the energy requirements for the  
463 membrane integration of OMPs. Our results are in line with molecular dynamics simulations  
464 (Liu and Gumbart, 2020; Noinaj *et al.*, 2013), *in vitro* studies that indicate that membrane  
465 thickness acts as a major barrier to OMP integration (Kleinschmidt and Tamm, 2002; Schiffrin *et*  
466 *al.*, 2017), and that membrane defects accelerate  $\beta$ -barrel folding (Danoff and Fleming, 2015).  
467 Second, we obtained evidence that OMP assembly is not only driven by the free energy of

468 folding but that the late stages of OMP folding are accelerated by BAM harnessing OM tension  
469 as a source of potential energy. Our experiments were inspired by an effort to explain the  
470 purpose of the unprecedented structures of the deflected EspP open  $\beta$ -sheets bound to BamA in  
471 an outward-open conformation. We proposed that the outward-open conformer of BamA holds  
472 the  $\beta$ -signal of the folding OMP at an angle at which the intrinsic structure of the open  $\beta$ -sheet  
473 state causes the hydrophobic transmembrane portions and aromatic girdles to deflect the OM.  
474 However, the intrinsic tension in the OM would counter this deflection and thereby forces the  $\beta$ -  
475 sheet to close into a  $\beta$ -barrel. Consistent with our model, we demonstrated that the rate of folding  
476 after the formation of a hybrid-barrel can be transiently slowed by conditions that relaxed the  
477 OM and can be accelerated when those conditions were reversed to increase the OM tension.  
478 Furthermore, because the concentration of OMPs in the OM contributes to its rigidity (Lessen et  
479 al., 2018; Rojas et al., 2018), it is plausible that the mysterious “OMP-islands” (pockets in the  
480 bacterial OM with dense OMP packing and low diffusion) generate local zones of high OM  
481 stiffness that promote the high  $\beta$ -barrel assembly activity attributed to them (Gunasinghe et al.,  
482 2018; Rassam et al., 2015; Ursell et al., 2012). From a different perspective, a rigid membrane  
483 might inhibit the integration of  $\alpha$ -helical proteins which typically fold into fluid membranes.  
484 Given that transmembrane  $\beta$ -barrel folding occurs in an environment that is devoid of known  
485 external energy sources (e.g., ATP, GTP, or useful electrochemical gradients), the ability of  
486 BAM to catalyze transmembrane  $\beta$ -barrel folding by a radically different mechanism that  
487 harnesses the unusual properties of the OM might help to explain why the bacterial OM is  
488 populated almost exclusively by  $\beta$ -barrel proteins.

## 489 MATERIALS AND METHODS

### 490 *Plasmids, bacterial strains, and growth media*

491 The *E. coli* B strain BL21(DE3) (Invitrogen catalog number C600003) was used for all  
492 experiments and *E. coli* K-12 strains XL1-Blue (Agilent catalog number 200236) or NEB5 $\alpha$   
493 (NEB catalog number C2987H) were routinely used for cloning and mutagenesis. Strains were  
494 grown in Lysogeny Broth (LB) (Miller or Lenox formulation as indicated) supplemented with  
495 ampicillin (100  $\mu\text{g mL}^{-1}$ ) and/or trimethoprim (50  $\mu\text{g mL}^{-1}$ ) as necessary. Oligonucleotides and  
496 plasmids used in this study are listed in Table S1. When necessary, BAM (<sup>His</sup>BamABCDE) was  
497 expressed from an IPTG inducible promoter in plasmid pMTD372 and <sup>MBP-76</sup>EspP was expressed  
498 from a *PrhaB* inducible promoter in plasmid pMTD607 (Doyle and Bernstein, 2019). Plasmids  
499 expressing cysteine substitution mutant derivatives of pMTD372 and pMTD607 were generated  
500 using the Q5 Site-Directed Mutagenesis Kit (NEB catalog number E0554S).

501

### 502 *Purification of BAM-<sup>MBP-76</sup>EspP native nanodiscs*

503 *E. coli* strain BL21(DE3) transformed with plasmids expressing <sup>His</sup>BamA<sub>S425C</sub>BCDE and <sup>MBP-</sup>  
504 <sup>76</sup>EspP<sub>S1299C</sub> were grown overnight in LB (Miller) at 25 °C. Overnight cultures were then washed  
505 and resuspended in fresh LB (1 culture volume) before inoculating 16 Thomson Ultra Yield  
506 flasks (each containing 1 L of LB (Miller)) at a starting OD<sub>600</sub> of 0.05. Cultures were grown for 4  
507 h (25 °C, 250 rpm), induced with 0.4 mM IPTG for 1 h, and then induced for a further 45 min  
508 with 0.2% L-rhamnose. Each culture was pelleted (5,000 x g, 10 min, 4 °C), resuspended in 50  
509 mL ice-cold phosphate buffered saline (PBS; 9 g L<sup>-1</sup> NaCl, 0.144 g L<sup>-1</sup> KH<sub>2</sub>PO<sub>4</sub>, 0.795 g L<sup>-1</sup>  
510 Na<sub>2</sub>HPO<sub>4</sub>, pH 7.4), and transferred to an Erlenmeyer flask on ice. Bacteria in each flask were  
511 treated with a final concentration of 0.4 mM 4-DPS (4,4'-dipyridyl disulfide; a thiol-specific

512 disulfide oxidizing catalyst) for 30 min with orbital shaking at 100 rpm in packed ice, pelleted  
513 (4,500 x g, 10 min, 4 °C), resuspended in 25 mL ice-cold PBS containing SigmaFast EDTA free  
514 protease inhibitors (PI), and then frozen in liquid nitrogen. All 400 mL of harvested bacteria  
515 were thawed and then lysed with a Constant Systems Cell Disruptor (15,000 psi, cooled to 5 °C).  
516 Cell debris was removed (20,000 x g, 15 min, 4 °C) and then the lysate was ultracentrifuged  
517 (194,903 x g, 2 h, 4 °C) to harvest membrane pellets. Using a Dounce homogenizer, membranes  
518 were homogenized in 55 mL native-nanodisc buffer (3 % Xiran SL30010P20 (Orbiscope), 50  
519 mM TrisHCl, 500 mM NaCl, 10 % glycerol, 1 mM EDTA, pH 8) containing freshly added PI  
520 and incubated at 4 °C for 5 h with constant inversion. The solution was ultracentrifuged (265,455  
521 x g, 40 min, 4 °C) and then the supernatant was collected and diluted 1:2 with a buffer (50 mM  
522 TrisHCl, 500 mM NaCl, 10 % glycerol, pH 8 at 4 °C) containing freshly added PI. The diluted  
523 protein solution was then incubated with 25 mL StrepTactin XT superflow resin (IBA GmbH) at  
524 4 °C overnight with constant inversion. The protein-resin solution was then transferred to a  
525 gravity column (all column steps mentioned hereafter were conducted at 4 °C) and the protein  
526 flow-through was passed over the resin a second time. The resin was washed with 10 x 50 mL  
527 TN buffer (50 mM TrisHCl, 500 mM NaCl, pH 8) at 4 °C before BAM-<sup>MBP-76</sup>EspP native  
528 nanodiscs were eluted with 150 mL biotin buffer (50 mM biotin, 50 mM TrisHCl, 500 mM  
529 NaCl, pH 8) at 4 °C. To concentrate and further purify the sample, imidazole (20 mM final) was  
530 added to the eluted protein which was subsequently incubated with 5 mL NiNTA resin (Qiagen)  
531 at 4 °C overnight with constant inversion. The protein solution was then transferred to a gravity  
532 column and the protein flow-through was passed over the resin twice more. The resin was  
533 washed with 3 x 10 mL of a buffer (20 mM imidazole, 50 mM TrisHCl, 500 mM NaCl pH 8) at  
534 4 °C before BAM-<sup>MBP-76</sup>EspP native nanodiscs were eluted with 15 mL of elution buffer (500



535 mM imidazole, 50 mM TrisHCl, 150 mM NaCl pH 8) at 4 °C. The eluted protein was desalted  
536 and exchanged into TN<sup>low</sup> buffer (50 mM TrisHCl, 150 mM NaCl, pH 8 at 4 °C) using Sephadex  
537 G-25 PD-10 desalting columns (Cytiva) following the manufacturers protocol before  
538 concentrating to a volume of 20-50 µL using an Amicon Ultra 0.5 mL concentrator (10 kDa cut-  
539 off). BAM<sup>-MBP-76</sup>EspP native nanodiscs were used immediately in grid-preparations. For each  
540 preparation, correct folding was confirmed by heat-modifiability/mobility-shift assays and  
541 activity was assessed by *in vitro* assembly-restart assays (see below).

542

### 543 ***Cryo-EM sample preparation and imaging***

544 BAM<sup>-MBP-76</sup>EspP native nanodiscs were diluted in TN<sup>low</sup> buffer at a concentration of ~2 – 8 mg  
545 L<sup>-1</sup>, and 3 µL of sample was applied onto glow-discharged C-flat grids (EMS CF-1.2/1.3-4Au-  
546 50) for 3 sec before plunge freezing in liquid ethane using a Leica EM Grid Plunger (Leica  
547 Microsystems). Datasets were collected at the NIH Multi-Institute Cryo-EM Facility (MICEF)  
548 using a Titan Krios G3 microscope (Thermo-Fisher) operating at 300 kV. During 4 collection  
549 sessions (Figure S5, dataset 1) micrographs were collected at a magnification of 130,000x  
550 (calibrated pixel size 0.5371 Å, nominal defocus range 0.6 to 1.8 µm, 40 frames, and 60 e<sup>-</sup>/Å<sup>2</sup>  
551 electron exposure per movie) using a Gatan K2 Summit direct electron detection camera  
552 equipped with a Gatan Quantum LS imaging energy filter with slit width set to 20 eV. After the  
553 microscope was upgraded with a Gatan K3 camera an additional collection session (Figure S5,  
554 dataset 2) was conducted at a magnification of 105,000x (calibrated pixel size 0.4281 Å, nominal  
555 defocus range 0.6 to 1.8 µm, 23 frames, and 60 e<sup>-</sup>/Å<sup>2</sup> electron exposure per movie).

556

### 557 ***Cryo-EM image processing***

558 Movie frames of BAM<sup>-MBP-76</sup>EspP cryo-electron micrographs were motion corrected and dose-  
559 weighted with MotionCor2 in RELION 3.1 (Zheng et al., 2017; Zivanov et al., 2018). CTF  
560 estimation was determined in RELION 3.1 using Ctfind4 (Rohou and Grigorieff, 2015). Initial  
561 particle picking was done with the Laplacian-of-Gaussian-based autopicking. Picked particles  
562 were processed to generate an initial 3D reference for autopicking in RELION 3.1. A total of  
563 25,393,510, particles, from dataset 1 collected on the K2 camera, and 9,873,900 particles, from  
564 dataset 2 on the K3 camera, were picked. Following one round of 2D classification and three  
565 rounds of 3D classification 3,996,756 particles from both datasets were merged with pixel size of  
566 1.07 Å /pixel. Because we aimed to visualize intermediate folding states of EspP, we performed  
567 focused classification 3D classification on the 3,996,756 million particles after signal subtraction  
568 of heterogenous BamA P3, BamB, and BamD N-terminus components, which yielded a subset of  
569 1,187,709 particles. These particles produced a 4.4 Å map using RELION 3.1. Following CTF  
570 refinement and particle polishing, the 1,187,709 particles were processed by three strategies in  
571 parallel using RELION 3.1 (Figure S5). Strategy 1 generated a 4.2 Å map after 3D refinement.  
572 Strategy 2 used 3D classification of the 1,187,709 particles in RELION 3.1 to reveal six classes  
573 of the BAM<sup>-MBP-76</sup>EspP complex. Strategy 3 used focused classification and refinement after  
574 signal subtraction of BamA P3, BamB, and BamD N-terminus revealed three folding states of  
575 EspP. Particles from strategy 1, the six classes in strategy 2, and the 3 states in strategy 3 were  
576 moved from the RELION 3.1 pipeline to cryoSPARC for further cryo-EM image processing  
577 (Punjani et al., 2017; Punjani et al., 2020). Following pruning of the particle sets by rounds of  
578 heterogenous refinement and final refinements, the following cryo-EM maps were obtained: (1)  
579 a 3.6 Å map of BAM<sup>-MBP-76</sup>EspP from strategy 1; (2) six cryo-EM maps capturing the motion in  
580 the soluble subunits of BAM<sup>-MBP-76</sup>EspP from strategy 2 [class 1 (4.5 Å), class 2 (4.3 Å), class 3

581 (4.2 Å), class 4 (4.3 Å), class 5 (4.3 Å), and class 6 (4.2 Å)]; (3) three cryo-EM maps following  
582 focused classification/refinement of the substrate region produced the OS-state (4.3 Å), IO-state  
583 (4.3 Å), and the B/CO-state (4.8 Å) stemming from strategy 3. Local resolution filtered maps  
584 were produced in cryoSPARC.

585

### 586 ***Model building and refinement***

587 Initial fitting of BAM-<sup>MBP-76</sup>EspP subunits into cryo-EM maps was done manually in UCSF  
588 Chimera (Pettersen et al., 2004) using Bam complex subunits from PDB 5D0O (Gu et al., 2016),  
589 EspP from PDB 2QOM and 3SLJ (Barnard et al., 2007; Barnard et al., 2012), and  
590 lipopolysaccharide from 5W7B (Gorelik et al., 2018). For the high-resolution 3.6 Å map, manual  
591 building/corrections of BamA subunits, EspP and LPS was done in Coot 0.9 and Isolde followed  
592 by model refinement using Rosetta and real-space refinement in Phenix (Adams et al., 2010;  
593 Croll, 2018; Emsley et al., 2010; Wang et al., 2016). The high-resolution atomic model derived  
594 from the 3.6 Å map was used as a starting model for building models of the six classes (from  
595 strategy 2) and the three focused states (from strategy 3). Because the substrate region in the  
596 focused maps is observed at low resolution, some of the EspP β-barrel N-terminus was docked  
597 into the map. The membrane interacting regions of EspP were better defined, could be identified  
598 by the orientations of proteins in OPM server (Lomize et al., 2012), and modeled into the cryo-  
599 EM map using Rosetta, Coot and Isolde (Croll, 2018; Emsley et al., 2010; Wang et al., 2016).  
600 The cryo-EM data collection, final refinement, and validation statistics for the 10 atomic models  
601 are presented in Table S2. Structural analysis, measurements and figures were prepared in  
602 Chimera and ChimeraX (Pettersen et al., 2021).

603

604 ***Data and code availability***

605 Structural data supporting findings in this study have been deposited in the Protein Data Bank  
606 (PDB) and the Electron Microscopy Data Bank (EMDB). The accession codes of the cryo-EM  
607 maps and accompanying atomic models have been provided for: (1) BAM-MBP-76EspP *high-*  
608 *resolution* (EMDB-xxxxx, PDB:xxx): (2) BAM-MBP-76EspP *class 1* (EMDB-xxxxx, PDB:xxx):  
609 (3) BAM-MBP-76EspP *class 2* (EMDB-xxxxx, PDB:xxx): (4) BAM-MBP-76EspP *class 3* (EMDB-  
610 xxxxx, PDB:xxx): (5) BAM-MBP-76EspP *class 4* (EMDB-xxxxx, PDB:xxx): (6) BAM-MBP-76EspP  
611 *class 5* (EMDB-xxxxx, PDB:xxx): (7) BAM-MBP-76EspP *class 6* (EMDB-xxxxx, PDB:xxx): (8)  
612 BAM-MBP-76EspP *open-sheet EspP state* (EMDB-xxxxx, PDB:xxx): (9) BAM-MBP-76EspP  
613 *intermediate-open EspP state* (EMDB-xxxxx, PDB:xxx): (10) BAM-MBP-76EspP *barrelized*  
614 *EspP/ continuous open BamA state* (EMDB-xxxxx, PDB:xxx).

615

616 ***In vivo disulfide-bond formation assay***

617 To observe site-specific interactions between BamD and the EspP  $\beta$ -barrel *in vivo*, disulfide-  
618 bond formation assays were conducted essentially as described (Doyle and Bernstein, 2019,  
619 2021). Briefly, strains containing appropriate plasmids were grown overnight from a single  
620 colony in 10 mL LB (Miller) at 25 °C with orbital shaking (250 rpm). Cultures were pelleted  
621 (3000 x g, 5 min, 4 °C), washed with 10 mL LB (Miller), and resuspended in 10 mL LB (Miller)  
622 before inoculating 10 mL LB (Miller) subcultures at OD<sub>600</sub> = 0.05. After cultures were grown for  
623 4 h (25 °C, 250 rpm) to OD<sub>600</sub> ~0.4 - 0.6, a final concentration of 0.4 mM IPTG was added to  
624 induce expression of BAM for 1 h. Subsequently, a final concentration of 0.2% L-rhamnose was  
625 added to induce expression of MBP-76EspP for 45 min. 1 mL samples were aliquoted into tubes on  
626 ice, pelleted (10,000 x g, 2 min, 4 °C), resuspended in 1 mL of ice-cold PBS, and incubated on

627 ice with 4-DPS at a concentration of 0.2 mM (or an equivalent volume of ethanol for mock  
628 treatment controls). After 30 min, samples were pelleted (10,000 x g, 2 min, 4 °C) and  
629 resuspended in 0.5 mL ice-cold PBS. Bacteria were then lysed, and proteins were precipitated by  
630 adding a final concentration of 10% (v/v) trichloroacetic acid (TCA) and 4 mM  
631 phenylmethanesulfonyl fluoride (PMSF) and incubating for 10 min on ice. The precipitated  
632 proteins were pelleted (20,817 x g, 10 min, 4 °C), washed with 0.6 mL ice-cold acetone, re-  
633 pelleted, and air-dried at 37 °C for 20 min. Proteins were resuspended in 2x SDS protein gel  
634 loading solution (Quality Biological) in a volume normalized to an OD<sub>600</sub> measurement recorded  
635 immediately as subculture samples were taken (volume in  $\mu\text{L}$  = 200 x OD<sub>600</sub>). Samples were  
636 heated to 99 °C for 15 min and aliquots (5  $\mu\text{L}$ ) resolved by SDS-PAGE on 8 % – 16 % Tris-  
637 glycine minigels (Invitrogen) (150 V, 1 h 47 min, room temperature) before being transferred to  
638 nitrocellulose for immunoblot analysis.

639

#### 640 ***Heat-modifiability/gel mobility-shift assay***

641 To observe the folded states of the BamA-EspP hybrid-barrel, purified BAM-<sup>MBP-76</sup>EspP native  
642 nanodiscs were diluted 1:9 in ice-cold TN buffer before aliquots were further diluted 1:9 in  
643 modified loading buffer (2x SDS protein gel loading solution serially diluted 1:1 with 20 %  
644 glycerol twice and then 1:1 again with TN buffer for a final SDS concentration of 0.5%) on ice.  
645 Aliquots were either heated to 99 °C for 10 min or retained on ice and proteins were immediately  
646 resolved by cold-SDS-PAGE (gel tank in packed ice, running at 150 V, 4 °C cold room). Gels  
647 were subsequently Coomassie Brilliant Blue (R-250) stained to detect proteins.

648

#### 649 ***In vivo* <sup>MBP-76</sup>EspP assembly-restart assays**

650 To monitor the final stages of assembly of EspP after the formation of a hybrid-barrel  
651 intermediate with BamA, bacteria containing plasmids that express BAM and <sup>MBP-76</sup>EspP were  
652 cultured overnight from a single colony in 10 mL LB (Lenox) at 25 °C with orbital shaking (250  
653 rpm). Cultures were pelleted (4,000 x g, 3 min, 4 °C), washed with LB (Lenox), and resuspended  
654 in 10 mL LB (Lenox) before inoculating 10 mL LB (Lenox) subcultures at OD<sub>600</sub> = 0.05. To  
655 create a pool of molecules at a hybrid-barrel intermediate stage of assembly in bacteria,  
656 subcultures were grown and the expression of BAM and <sup>MBP-76</sup>EspP was induced as in the  
657 disulfide-bond formation assays described above. Aliquots (1 mL samples) were then pelleted  
658 (10,000 x g, 2 min, 20 °C), resuspended in equivalent volumes of either LB (Lenox) or LB  
659 (Lenox) containing 0.8 M sorbitol (LB-Sorbitol), and pre-incubated in a Thermomixer  
660 (Eppendorf) (20 °C, 350 rpm). After 5 min pre-incubation, 200 µg mL<sup>-1</sup> PK (or an equivalent  
661 volume of 50 mM TrisHCl pH 8 for mock-treated controls) was added and bacteria were  
662 incubated (20 °C, 350 rpm) for 0, 2, 5, 10, and 20 min. For experiments requiring media  
663 exchange from LB-Sorbitol, samples incubated with PK for 5 min were pelleted (15,000 x g, 20  
664 s, 20 °C), resuspended in 1 mL of either LB (Lenox) or LB-Sorbitol (media pre-equilibrated to  
665 20 °C), and further incubated (20 °C, 350 rpm) until 10 or 20 min after PK addition. For  
666 experiments requiring disulfide-crosslinking, bacteria incubated with PK for 5 min were pelleted  
667 (15,000 x g, 20 s, 4 °C), resuspended on ice in 1 mL ice-cold LB (Lenox) or LB-Sorbitol  
668 (matching the previous incubation medium for each sample), and incubated on ice for 2 min in  
669 the presence of 4-DPS (0.2 mM final concentration). To stop reactions at required time-points,  
670 bacteria were pelleted (15,000 x g, 20 s, 4 °C), resuspended in 0.5 mL ice-cold LB (Lenox) or  
671 LB-Sorbitol (matching the previous incubation medium for each sample), and TCA precipitated

672 as described above. Precipitated proteins were solubilized and resolved by SDS-PAGE as  
673 described above.

674

### 675 ***Immunoblotting and image quantitation***

676 The iBlotII transfer device (Life Technologies) was routinely used to transfer protein gels to  
677 nitrocellulose membranes. Immunoblotting buffer [Odyssey Blocking Buffer (Li-Cor) and PBS  
678 (mixed together at a 1:1 ratio)] supplemented with 0.01 % Tween-20 was used for blocking steps  
679 and as a diluent for primary and secondary antibodies. Monoclonal mouse anti-StrepII and anti-  
680 His antibodies were obtained from QIAGEN (catalog number 34850) and Genscript (catalog  
681 number A00186), respectively. Polyclonal rabbit anti-BamD and anti-EspP $\beta$ C have been  
682 described previously (Pavlova et al., 2013). Infra-red Goat anti-mouse Ig secondary antibodies  
683 (anti-mouse 800CW IRDye, catalog number 926-32210) or anti-rabbit Ig (anti-rabbit 680LT  
684 IRDye, catalog number 926-680210) were obtained from Li-Cor. Membranes were blocked  
685 overnight, incubated with primary antibodies for 18 h, washed twice with PBS-T (PBS  
686 supplemented with 0.01 % Tween-20), incubated for 2 h with secondary antibodies, and washed  
687 twice with PBS-T and three times with PBS before air drying (37 °C, 20 min). Dried membranes  
688 were scanned using maximum quality and resolution settings with an Amersham Typhoon 5  
689 imager (GE Healthcare) outfitted with 785 nm and 685 nm lasers and IRlong 825BP30 and  
690 IRShort 720BP20 filters. Within-lane pixel intensities were measured using Fiji software (v2.0.0-  
691 rc-68/1.52 g) and used to calculate the fraction of the band of interest relative to other bands of  
692 interest [e.g. for assembly restart assays, the fraction of folded EspP  $\beta$ -barrel was determined by  
693 using the formula [folded EspP  $\beta$ -barrel/sum of EspP signals)].

694

695 **ACKNOWLEDGEMENTS**

696 This work was supported by the National Institute of Diabetes and Digestive and Kidney  
697 Diseases Intramural Research Program. JRJ is a recipient of NIGMS MOSAIC K99/R00 and  
698 NIDDK Nancy Nossal awards. The structural studies were performed at the NIH Multi-Institute  
699 Cryo-EM Facility (MICEF) and the NIDDK Cryo-EM core facility and utilized computational  
700 resources from the NIH HPC Biowulf cluster (<http://hpc.nih.gov>). We thank Huaibin Wang,  
701 Haifeng He, and Bertram Canagarajah for technical support with electron microscopy and  
702 computing.

703

704 **AUTHOR CONTRIBUTIONS**

705 The study was originally conceived by MTD and HDB, but all authors contributed to  
706 experimental design. The experiments and data processing were conducted by MTD and JRJ.  
707 The paper was written and edited by all authors. The project was supervised by JEH and HDB.

708



709 **FIGURES & LEGENDS**

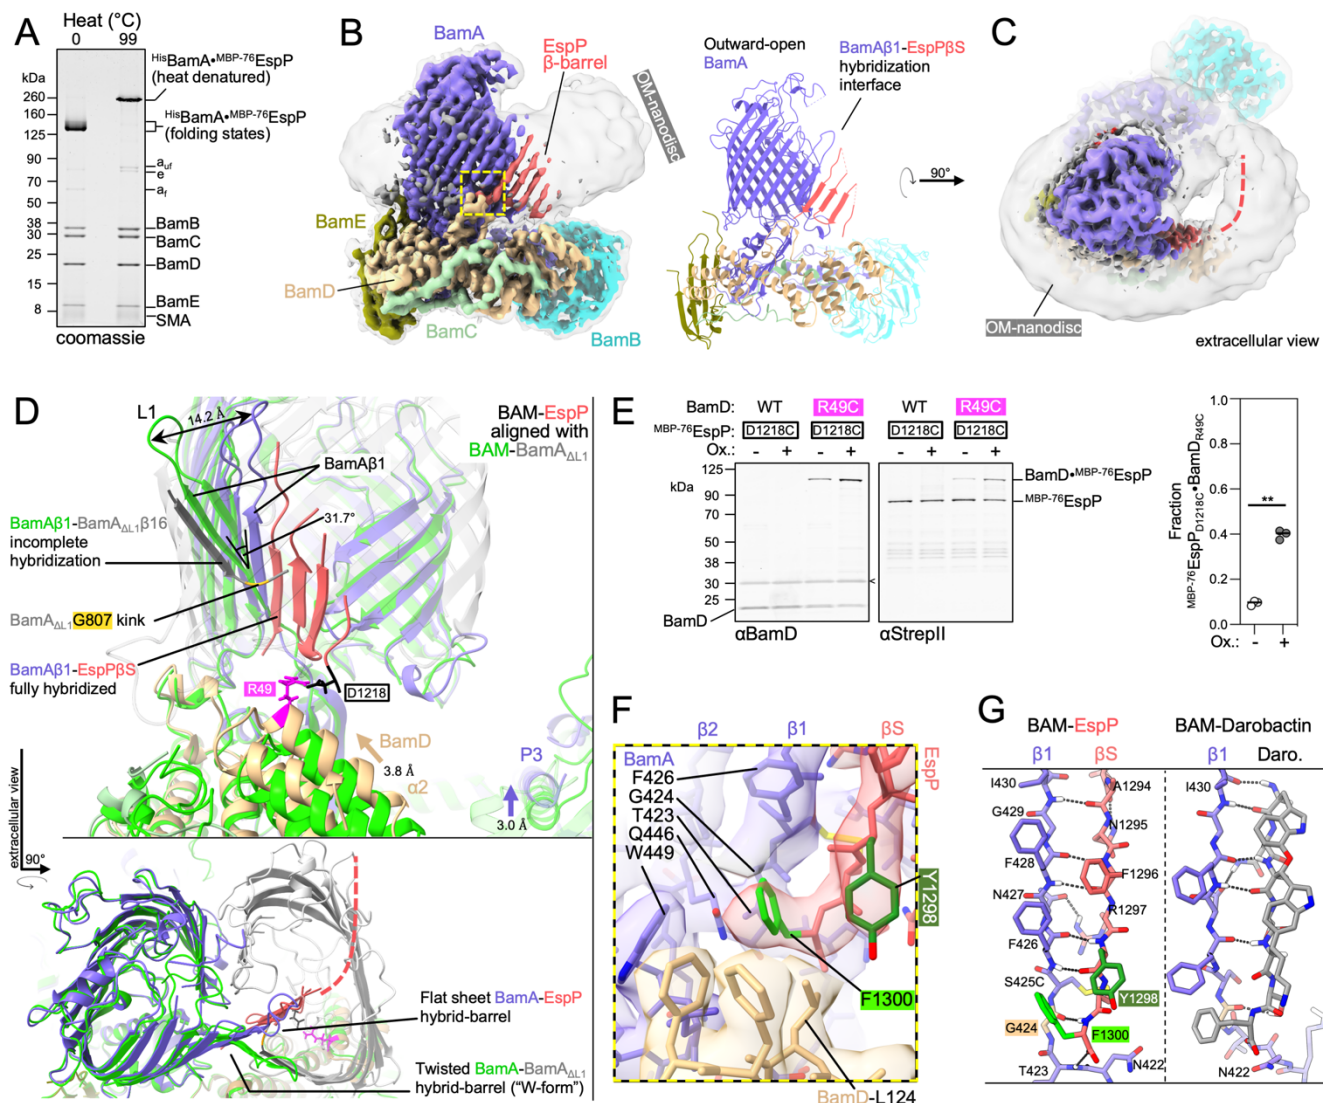

710

711 **Figure 1: BAM binds the conserved OMP β-signal to form a flat hybrid β-sheet in the OM.**

712 (A) Heat denatured (99 °C) or unheated BAM-MBP-76EspP OM-nanodiscs were resolved by cold-

713 SDS-PAGE. BamA and MBP-76EspP are disulfide-crosslinked (•) (via S425C and S1299C,

714 respectively). Unoxidized MBP-76EspP (e), BamA folded (a<sub>f</sub>) and unfolded (a<sub>uf</sub>) species, and SMA

715 copolymers are indicated. (B) High-resolution cryo-EM map (left, 3.6 Å average) and model of

716 BAM-MBP-76EspP (3.6 Å average). Map colored by subunit. Local resolution filtered map at a

717 lower threshold level (left, transparent grey) shows OM disc boundary. BamA is in an outward-

718 open conformation and hybridized to the EspP  $\beta$ -signal ( $\beta$ S) strand via BamA  $\beta$ -strand 1 ( $\beta$ 1).  
719 Yellow box shown in **F**. **(C)** Extracellular top view of map as in **B**. Dashed line indicates likely  
720 location of remainder of EspP  $\beta$ -barrel. **(D)** Substrate-specific intermediate states and BAM  
721 conformations during the assembly of EspP  $\beta$ -barrel and BamA $_{\Delta$ L1. Structure of BAM-BamA $_{\Delta$ L1  
722 hybrid-barrel intermediate state in detergent (PDB 6V05) (BAM, green; BamA $_{\Delta$ L1, transparent  
723 grey) is aligned with the BAM-<sup>MBP-76</sup>EspP structure (subunit colors as in **C**). The noncanonical  
724 final strand of BamA $_{\Delta$ L1 is not fully hybridized with BamA $\beta$ 1 (kink at BamA<sub>G807</sub>, yellow)  
725 whereas the conserved EspP  $\beta$ -signal strand is fully hybridized with BamA $\beta$ 1. A 31.7° difference  
726 in BamA $\beta$ 1 tilt angle [axis residues 427 – 434 alpha carbons ( $\alpha$ C)] coincides with either “flat-  
727 sheet” (BamA-EspP) or twisted “W-shaped” (BamA-BamA $_{\Delta$ L1) hybrid-barrel assembly  
728 intermediates. BamA POTRA3 (“P3”) and BamD  $\alpha$ -helix 2 (“ $\alpha$ 2”) are denoted. **(E)** *E. coli*  
729 BL21(DE3) expressing <sup>His</sup>BamABCDE (or <sup>His</sup>BamABCD<sub>R49C</sub>E) and <sup>MBP-76</sup>EspP<sub>D1218C</sub> (residues  
730 mutated to cysteine indicated in **D**) were mock treated (Ox. -) or treated with 4-DPS (Ox. +) and  
731 BamD•<sup>MBP-76</sup>EspP crosslinks were identified by double-immunoblotting with  $\alpha$ BamD and  
732  $\alpha$ StrepII (StrepII-tag at <sup>MBP-76</sup>EspP N-terminus) antibodies (n = 3). Non-specific band is denoted  
733 (<). The graph (right) shows the fraction of crosslinked BamD•<sup>MBP-76</sup>EspP [line at median, two-  
734 tailed paired t-test:  $P = 0.0019$  (\*\*)]. **(F)**  $\beta$ -signal terminal residue binding pocket (magnified  
735 yellow box in **B**). Highly conserved Y(-3, dark green) and F(-1, light green)  $\beta$ -signal residues are  
736 indicated. **(G)** Comparison of BamA $\beta$ 1-EspP  $\beta$ -signal strand and BamA $\beta$ 1-darobactin (PDB  
737 7NRI) interactions. In both cases F(-1) is positioned over the space created by BamA<sub>G424</sub> (tan).  
738 Dotted lines denote H-bonds.

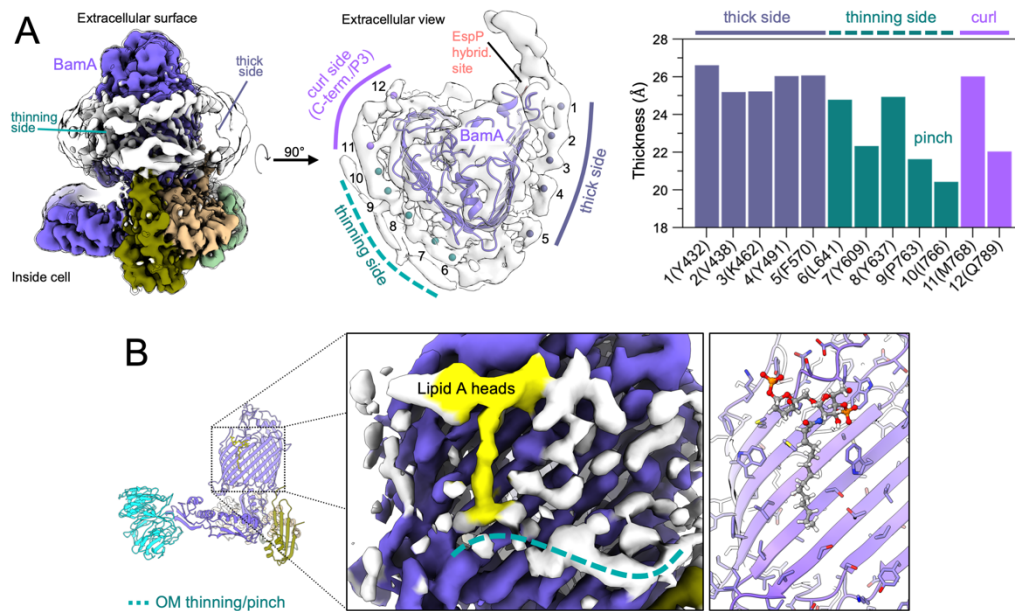

739

740 **Figure 2: OM thinning and lipid/LPS ordering during OMP folding. (A)** Left, side view of  
 741 BAM-<sup>MBP-76</sup>EspP showing both thin and thick membrane sides around BamA [local resolution  
 742 filtered map to showing protein (colored) and membrane (white) features and at a lower  
 743 threshold (clear) to show OM-disc boundary]. Middle, extracellular view of map with  
 744 measurement marker positions (circles) indicated. Repeated pattern in the OM-disc indicative of  
 745 outer leaflet interfacial lipid A head groups. Right, thickness measurements of membrane density  
 746 surrounding the BamA  $\beta$ -barrel at indicated positions (residues close to outer leaflet markers in  
 747 brackets). **(B)** BAM-<sup>MBP-76</sup>EspP map shows density consistent with a lipid A head groups and a  
 748 stabilized acyl chain (yellow) (modeled on right) on the thinning side of the BamA  $\beta$ -barrel (teal  
 749 dashed line).

750

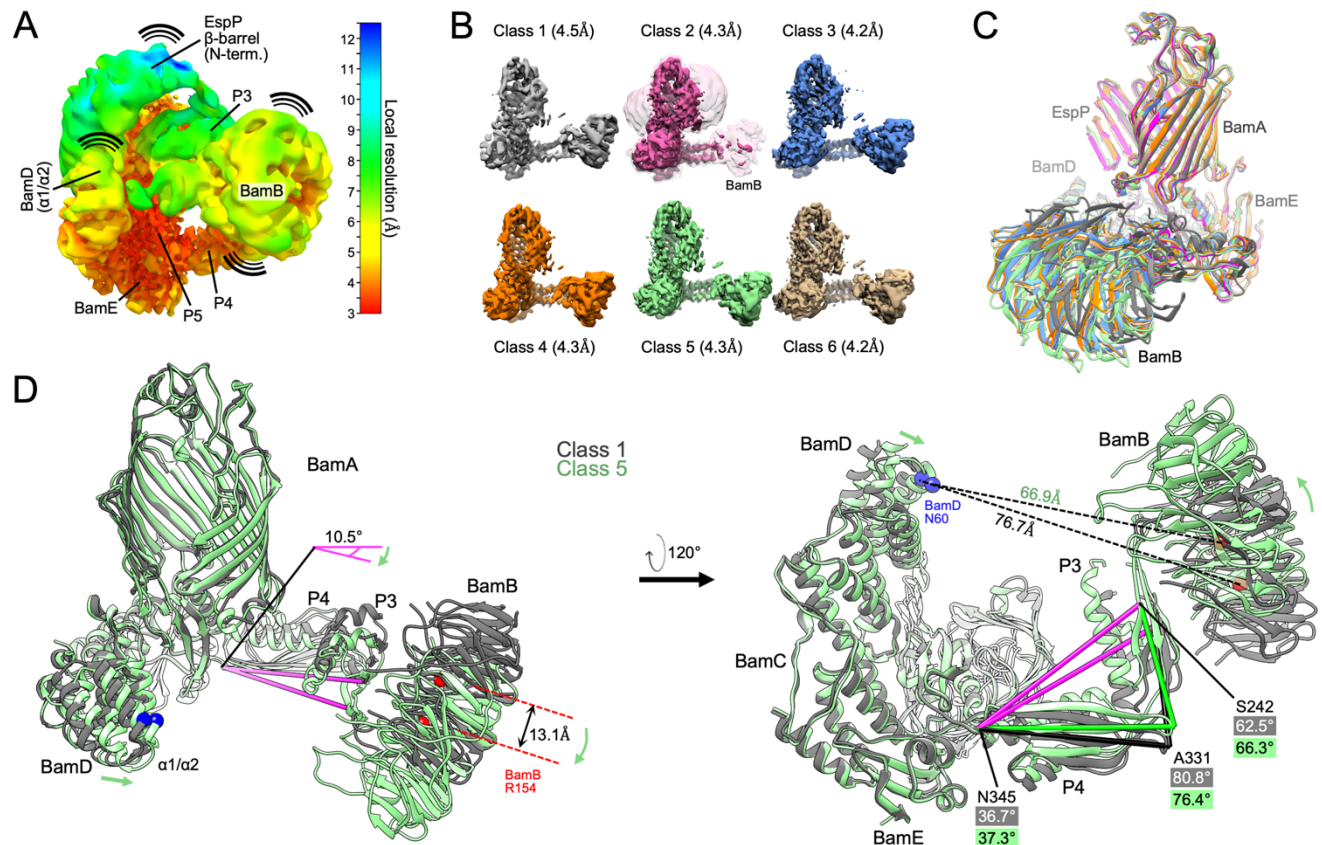

751

752 **Figure 3: Conformational changes of BAM periplasmic components during OMP folding.**

753 **(A)** The BAM<sup>-MBP-76</sup>EspP high-resolution map (shown in Figure 1B) filtered and colored by  
 754 local resolution. Low resolution components [e.g. EspP β-barrel N-terminus, BamB, and  
 755 POTRA3 (P3)] are conformationally dynamic. High-resolution components (e.g. BamE and P5  
 756 are conformationally stable. **(B)** Conformationally diverse cryo-EM maps of BAM<sup>-MBP-76</sup>EspP.  
 757 Maps filtered by local resolution. Class 2 is shown at a lower threshold level (clear pink) to show  
 758 BamB **(C)** Models of BAM<sup>-MBP-76</sup>EspP Classes 1 – 6 were aligned (based on BamA P5 residues  
 759 Y348 – R421). View shows large conformational variability in BamB positioning. Colors as in  
 760 **B.** **(D)** Classes 1 and 5 aligned as in **C**. Conformational changes are depicted by green arrows.  
 761 Axis (pink) from BamA S242 (P3) to N345 (hinge region between P4 & P5) α-carbons flexes by  
 762 10.5° between classes. Changes in the angles between S242, A331, and N345 also shows flexing  
 763 between P3 & P4 between classes.

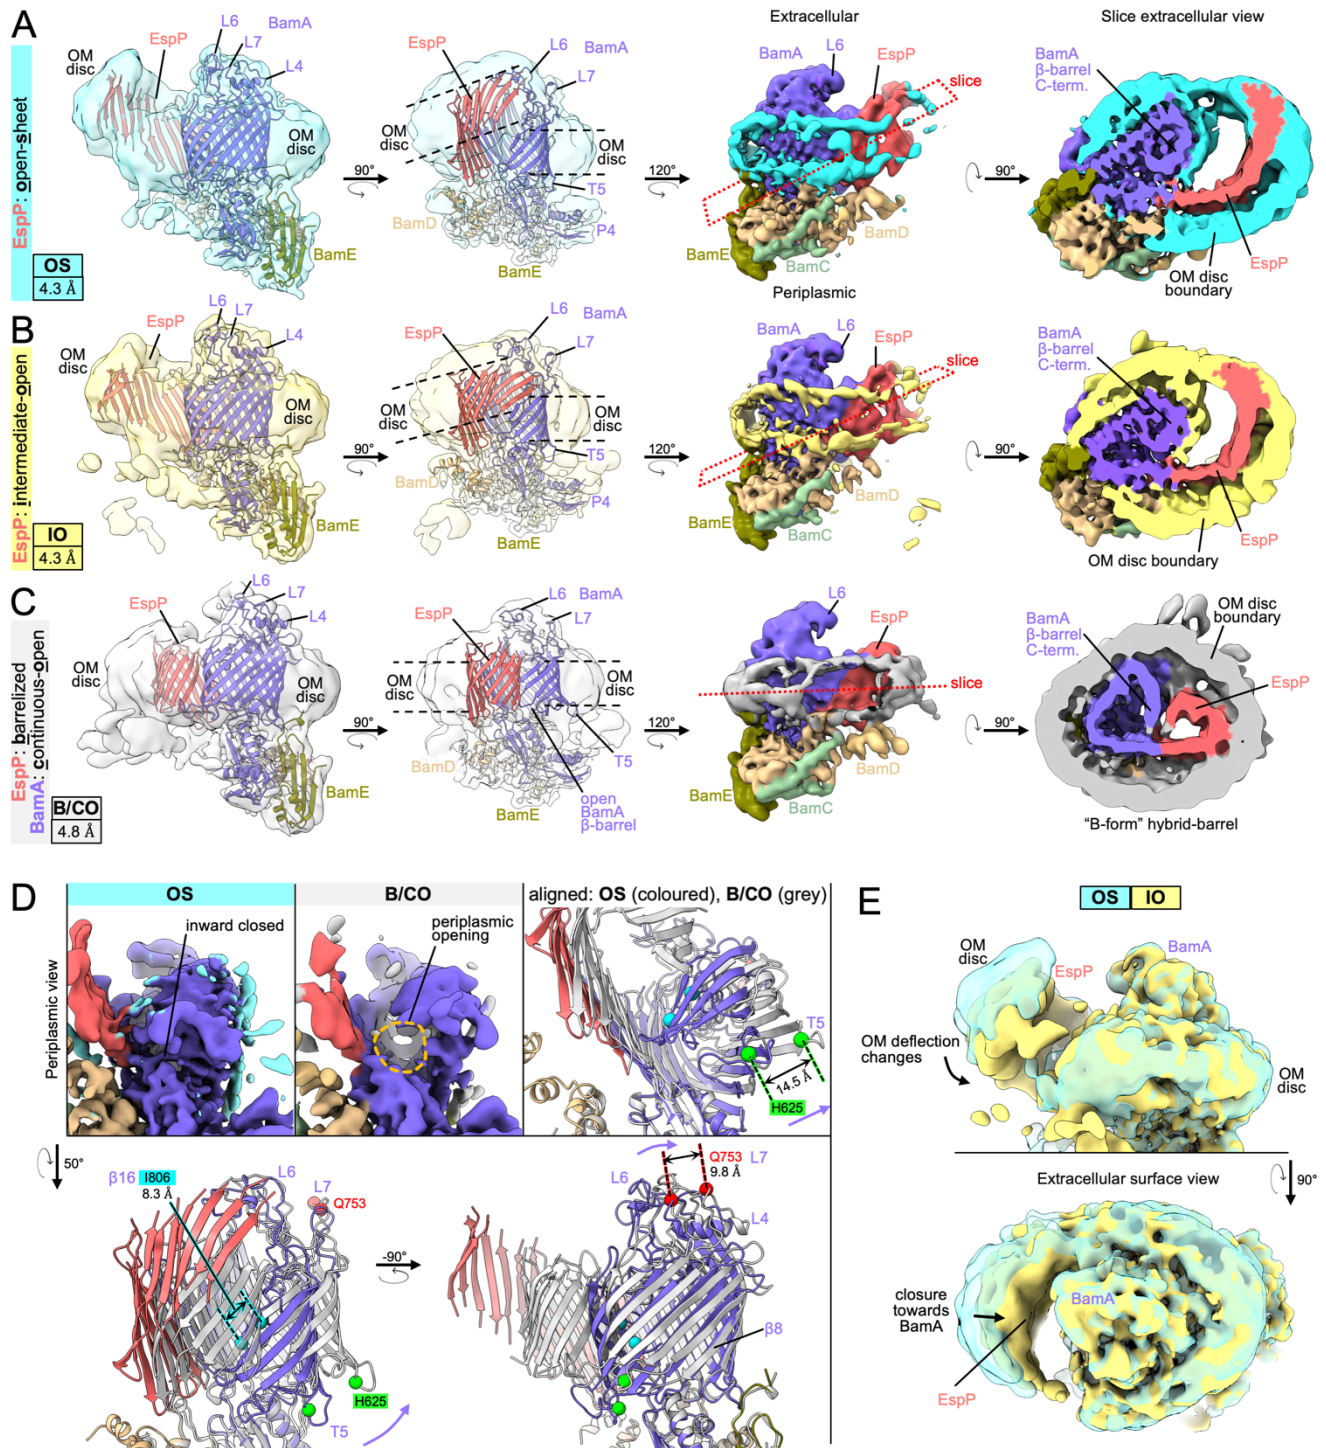

764

765 **Figure 4: Focused classification reveals a continuous-open BamA  $\beta$ -barrel and multiple**  
 766 **hybrid-barrel substates during EspP folding. (A-C) Focused classification and refinements on**  
 767 **particles with subtracted signals of dynamic periplasmic components (BamD N-term., P3, and**

768 BamB) identified three distinct BamA-EspP hybrid-barrel conformations: EspP “open-sheet”  
769 (OS, panel **A**, OM-disc in cyan), EspP “intermediate-open” (IO, panel **B**, OM-disc in yellow),  
770 and EspP “barrelized” / BamA “continuous-open” (B/CO, panel **C**, OM-disc in light gray). Map  
771 resolutions are quoted at bottom left. Dashed lines in mid-left views indicate in-plane or  
772 deflected bilayer angles. Right views, maps are colored by subunit. Far-right shows slices across  
773 the BamA-EspP hybrid-barrels (slice planes depicted mid-right) with expanded hybrid-barrels  
774 for OS and IO, and a “B-shaped” hybrid-barrel for the B/CO state. Maps are filtered by local  
775 resolution. **(D)** Identification of a novel BamA conformation during OMP assembly. Compared  
776 to the OS class (and all other reconstructions in this work) the B/CO class exhibits the BamA  $\beta$ -  
777 barrel in an expanded conformation similar to outward-open conformations but with a  
778 periplasmic opening (compare maps top left and middle, periplasmic view). In top-right and  
779 bottom panels, models of OS and B/CO states are aligned (on P5 residues Y348 – R421)  
780 showing that the C-terminal half of the BamA  $\beta$ -barrel both expands and shifts towards the cell  
781 surface through changes beginning at strand  $\beta$ 8. The expansion also coincides with extracellular  
782 loops (L4, 6, and 7) moving away from the hybridization interface. Differences in selected  
783 residue  $\alpha$ C positions in turn 5 (T5, H625), L7 (Q753), and  $\beta$ 16 (I806) between OS and B/CO  
784 states are denoted. **(E)** Overlay of OS and IO maps (filtered by local resolution) shows changes  
785 in the degree of OM-bilayer deflection and degree of closure in the EspP  $\beta$ -sheet region.  
786

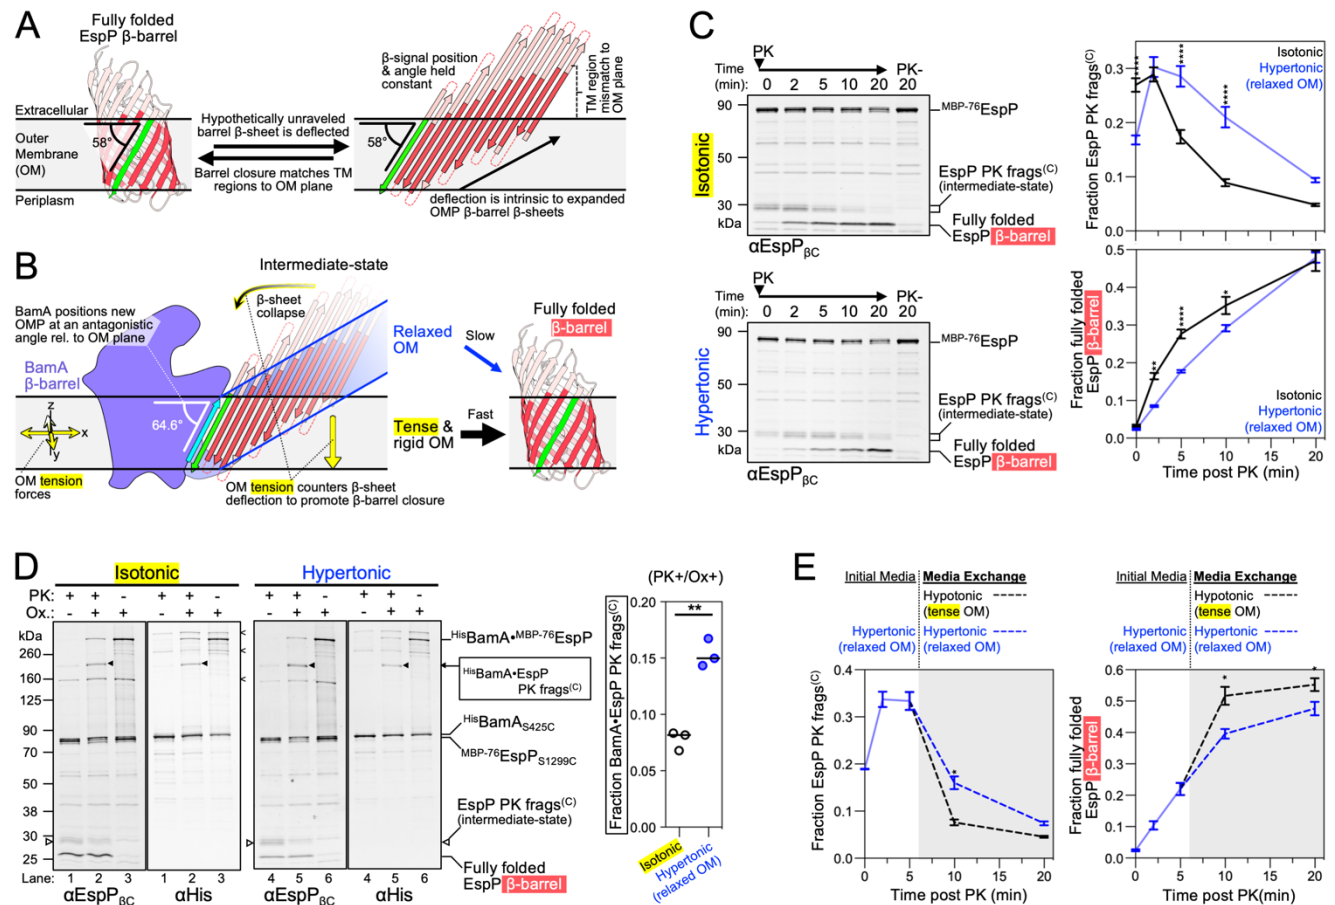

787

788 **Figure 5: OM tension accelerates transmembrane  $\beta$ -barrel folding.** (A) Hypothetically  
 789 unraveled EspP  $\beta$ -barrel with the position of the conserved  $\beta$ -signal strand (green) held constant  
 790 to its angular membrane orientation when fully folded ( $58^\circ$  for EspP, membrane plane calculated  
 791 using OPM server) (Lomize et al., 2012) showing intrinsic mismatch between the membrane  
 792 plane and the transmembrane portion of  $\beta$ -strands (red). Depicted loops and turns are not drawn  
 793 to-scale. (B) EspP  $\beta$ -sheet as in A except model depicted with experimentally determined angle  
 794 (using the BAM-<sup>MBP-76</sup>EspP high resolution structure) of EspP  $\beta$ -signal relative to the membrane  
 795 when hybridized to BamA $\beta$ 1 (cyan). The model predicts that the intrinsic tension forces of the  
 796 rigid OM of Gram-negative bacteria aids  $\beta$ -barrel folding by countering the intrinsic deflection  
 797 of an incompletely folded expanded  $\beta$ -sheet. (C) *E. coli* BL21(DE3) expressing HisBamABCDE  
 798 and <sup>MBP-76</sup>EspP were suspended in LB (isotonic control) or LB-sorbitol (hypertonic) to generate

799 cells with a relaxed OM.  $\beta$ -barrel folding was restarted from the hybrid-barrel stage by adding  
800 PK to release a C-terminal EspP fragment (frags<sup>(C)</sup>). Fragment conversion to a completely folded  
801  $\beta$ -barrel after PK addition was monitored by immunoblotting using an antiserum generated  
802 against the C-terminus of EspP ( $\alpha$ EspP <sub>$\beta$ C</sub>). Left, representative blots. Right, mean fraction of the  
803 EspP PK fragment (top) or converted into a folded  $\beta$ -barrel (bottom) ( $\pm$ SEM, n = 4). **(D)** *E. coli*  
804 BL21(DE3) expressing HisBamA<sub>S425C</sub>BCDE and MBP-76EspP<sub>S1299C</sub> were grown and treated as in C  
805 except that samples at 5 min post PK were mock treated (Ox. -) or treated with 4-DPS (Ox. +)  
806 and HisBamA•MBP-76EspP crosslinks were identified by double-immunoblotting with  $\alpha$ EspP <sub>$\beta$ C</sub> and  
807  $\alpha$ His antibodies (n = 3). Non-specific crosslinks are denoted (<). Right, fraction of crosslinked  
808 BamA•MBP-76EspP C-terminal PK fragment out of all bands detected with  $\alpha$ EspP <sub>$\beta$ C</sub> [line at  
809 median, two-tailed paired t-test:  $P = 0.0038$  (\*\*)]. **(E)** Bacteria were grown, suspended in LB-  
810 sorbitol, and treated with PK as in C except that after 5 min the media was exchanged for either  
811 LB-sorbitol (hypertonic) or LB (hypotonic) (gray plot area). Plots are mean fraction ( $\pm$ SEM, n =  
812 3). For C and E, 2-way repeated measures ANOVA (Šídák's tests) were performed \* $p < 0.05$ ,  
813 \*\* $p < 0.01$ , and \*\*\*\* $p < 0.0001$ .  
814



## 815 REFERENCES

- 816 Adams, P.D., Afonine, P.V., Bunkóczi, G., Chen, V.B., Davis, I.W., Echols, N., Headd, J.J., Hung, L.W., Kapral,  
817 G.J., Grosse-Kunstleve, R.W., *et al.* (2010). PHENIX: a comprehensive Python-based system for macromolecular  
818 structure solution. *Acta Crystallogr D Biol Crystallogr* *66*, 213-221. 10.1107/S0907444909052925.  
819
- 820 Anwari, K., Webb, C.T., Poggio, S., Perry, A.J., Belousoff, M., Celik, N., Ramm, G., Lovering, A., Sockett, R.E.,  
821 Smit, J., *et al.* (2012). The evolution of new lipoprotein subunits of the bacterial outer membrane BAM complex.  
822 *Mol Microbiol* *84*, 832-844. 10.1111/j.1365-2958.2012.08059.x.  
823
- 824 Barnard, T.J., Dautin, N., Lukacik, P., Bernstein, H.D., and Buchanan, S.K. (2007). Autotransporter structure  
825 reveals intra-barrel cleavage followed by conformational changes. *Nat Struct Mol Biol* *14*, 1214-1220.  
826 10.1038/nsmb1322.  
827
- 828 Barnard, T.J., Gumbart, J., Peterson, J.H., Noinaj, N., Easley, N.C., Dautin, N., Kuszak, A.J., Tajkhorshid, E.,  
829 Bernstein, H.D., and Buchanan, S.K. (2012). Molecular basis for the activation of a catalytic asparagine residue in a  
830 self-cleaving bacterial autotransporter. *J Mol Biol* *415*, 128-142. 10.1016/j.jmb.2011.10.049.  
831
- 832 Croll, T.I. (2018). ISOLDE: a physically realistic environment for model building into low-resolution electron-  
833 density maps. *Acta Crystallogr D Struct Biol* *74*, 519-530. 10.1107/S2059798318002425.  
834
- 835 Danoff, E.J., and Fleming, K.G. (2015). Membrane defects accelerate outer membrane beta-barrel protein folding.  
836 *Biochemistry* *54*, 97-99. 10.1021/bi501443p.  
837
- 838 Dautin, N., Barnard, T.J., Anderson, D.E., and Bernstein, H.D. (2007). Cleavage of a bacterial autotransporter by an  
839 evolutionarily convergent autocatalytic mechanism. *EMBO J* *26*, 1942-1952. 10.1038/sj.emboj.7601638.  
840
- 841 Doerner, P.A., and Sousa, M.C. (2017). Extreme Dynamics in the BamA beta-Barrel Seam. *Biochemistry* *56*, 3142-  
842 3149. 10.1021/acs.biochem.7b00281.  
843
- 844 Doyle, M.T., and Bernstein, H.D. (2019). Bacterial outer membrane proteins assemble via asymmetric interactions  
845 with the BamA beta-barrel. *Nat Commun* *10*, 3358. 10.1038/s41467-019-11230-9.  
846
- 847 Doyle, M.T., and Bernstein, H.D. (2021). BamA forms a translocation channel for polypeptide export across the  
848 bacterial outer membrane. *Mol Cell* *81*, 2000-2012 e2003. 10.1016/j.molcel.2021.02.023.  
849
- 850 Emsley, P., Lohkamp, B., Scott, W.G., and Cowtan, K. (2010). Features and development of Coot. *Acta Crystallogr*  
851 *D Biol Crystallogr* *66*, 486-501. 10.1107/S0907444910007493.  
852
- 853 Franklin, M.W., Nepomnyachyi, S., Feehan, R., Ben-Tal, N., Kolodny, R., and Slusky, J.S. (2018). Evolutionary  
854 pathways of repeat protein topology in bacterial outer membrane proteins. *Elife* *7*. 10.7554/eLife.40308.  
855
- 856 Gessmann, D., Chung, Y.H., Danoff, E.J., Plummer, A.M., Sandlin, C.W., Zaccai, N.R., and Fleming, K.G. (2014).  
857 Outer membrane beta-barrel protein folding is physically controlled by periplasmic lipid head groups and BamA.  
858 *Proc Natl Acad Sci U S A* *111*, 5878-5883. 10.1073/pnas.1322473111.  
859
- 860 Gorelik, A., Illes, K., and Nagar, B. (2018). Crystal structure of the mammalian lipopolysaccharide detoxifier. *Proc*  
861 *Natl Acad Sci U S A* *115*, E896-E905. 10.1073/pnas.1719834115.  
862
- 863 Gruss, F., Zahringer, F., Jakob, R.P., Burmann, B.M., Hiller, S., and Maier, T. (2013). The structural basis of  
864 autotransporter translocation by TamA. *Nat Struct Mol Biol* *20*, 1318-1320. 10.1038/nsmb.2689.  
865
- 866 Gu, Y., Li, H., Dong, H., Zeng, Y., Zhang, Z., Paterson, N.G., Stansfeld, P.J., Wang, Z., Zhang, Y., Wang, W., *et al.*  
867 (2016). Structural basis of outer membrane protein insertion by the BAM complex. *Nature* *531*, 64-69.  
868 10.1038/nature17199.

869  
870 Gunasinghe, S.D., Shiota, T., Stubenrauch, C.J., Schulze, K.E., Webb, C.T., Fulcher, A.J., Dunstan, R.A., Hay, I.D.,  
871 Naderer, T., Whelan, D.R., *et al.* (2018). The WD40 Protein BamB Mediates Coupling of BAM Complexes into  
872 Assembly Precincts in the Bacterial Outer Membrane. *Cell Rep* 23, 2782-2794. 10.1016/j.celrep.2018.04.093.  
873  
874 Hagan, C.L., Wzorek, J.S., and Kahne, D. (2015). Inhibition of the beta-barrel assembly machine by a peptide that  
875 binds BamD. *Proc Natl Acad Sci U S A* 112, 2011-2016. 10.1073/pnas.1415955112.  
876  
877 Han, L., Zheng, J., Wang, Y., Yang, X., Liu, Y., Sun, C., Cao, B., Zhou, H., Ni, D., Lou, J., *et al.* (2016). Structure  
878 of the BAM complex and its implications for biogenesis of outer-membrane proteins. *Nat Struct Mol Biol* 23, 192-  
879 196. 10.1038/nsmb.3181.  
880  
881 Hart, E.M., Gupta, M., Wuhr, M., and Silhavy, T.J. (2020). The gain-of-function allele bamA E470K bypasses the  
882 essential requirement for BamD in beta-barrel outer membrane protein assembly. *Proc Natl Acad Sci U S A* 117,  
883 18737-18743. 10.1073/pnas.2007696117.  
884  
885 Hart, E.M., and Silhavy, T.J. (2020). Functions of the BamBCDE Lipoproteins Revealed by Bypass Mutations in  
886 BamA. *J Bacteriol* 202. 10.1128/JB.00401-20.  
887  
888 Heinz, E., and Lithgow, T. (2014). A comprehensive analysis of the Omp85/TpsB protein superfamily structural  
889 diversity, taxonomic occurrence, and evolution. *Front Microbiol* 5, 370. 10.3389/fmicb.2014.00370.  
890  
891 Heinz, E., Selkrig, J., Belousoff, M.J., and Lithgow, T. (2015). Evolution of the Translocation and Assembly  
892 Module (TAM). *Genome Biol Evol* 7, 1628-1643. 10.1093/gbe/evv097.  
893  
894 Horne, J.E., Brockwell, D.J., and Radford, S.E. (2020). Role of the lipid bilayer in outer membrane protein folding  
895 in Gram negative bacteria. *J Biol Chem*. 10.1074/jbc.REV120.011473.  
896  
897 Iadanza, M.G., Higgins, A.J., Schiffrin, B., Calabrese, A.N., Brockwell, D.J., Ashcroft, A.E., Radford, S.E., and  
898 Ranson, N.A. (2016). Lateral opening in the intact beta-barrel assembly machinery captured by cryo-EM. *Nat*  
899 *Commun* 7, 12865. 10.1038/ncomms12865.  
900  
901 Iadanza, M.G., Schiffrin, B., White, P., Watson, M.A., Horne, J.E., Higgins, A.J., Calabrese, A.N., Brockwell, D.J.,  
902 Tuma, R., Kalli, A.C., *et al.* (2020). Distortion of the bilayer and dynamics of the BAM complex in lipid nanodiscs.  
903 *Commun Biol* 3, 766. 10.1038/s42003-020-01419-w.  
904  
905 Ieva, R., and Bernstein, H.D. (2009). Interaction of an autotransporter passenger domain with BamA during its  
906 translocation across the bacterial outer membrane. *Proc Natl Acad Sci U S A* 106, 19120-19125.  
907 10.1073/pnas.0907912106.  
908  
909 Ieva, R., Tian, P., Peterson, J.H., and Bernstein, H.D. (2011). Sequential and spatially restricted interactions of  
910 assembly factors with an autotransporter beta domain. *Proc Natl Acad Sci U S A* 108, E383-391.  
911 10.1073/pnas.1103827108.  
912  
913 Imai, Y., Meyer, K.J., Iinishi, A., Favre-Godal, Q., Green, R., Manuse, S., Caboni, M., Mori, M., Niles, S.,  
914 Ghiglieri, M., *et al.* (2019). A new antibiotic selectively kills Gram-negative pathogens. *Nature* 576, 459-464.  
915 10.1038/s41586-019-1791-1.  
916  
917 Jaroslowski, S., Duquesne, K., Sturgis, J.N., and Scheuring, S. (2009). High-resolution architecture of the outer  
918 membrane of the Gram-negative bacteria *Roseobacter denitrificans*. *Mol Microbiol* 74, 1211-1222. 10.1111/j.1365-  
919 2958.2009.06926.x.  
920  
921 Kaur, H., Jakob, R.P., Marzinek, J.K., Green, R., Imai, Y., Bolla, J.R., Agustoni, E., Robinson, C.V., Bond, P.J.,  
922 Lewis, K., *et al.* (2021). The antibiotic darobactin mimics a beta-strand to inhibit outer membrane insertase. *Nature*  
923 593, 125-129. 10.1038/s41586-021-03455-w.  
924

- 925 Kleinschmidt, J.H., and Tamm, L.K. (2002). Secondary and tertiary structure formation of the beta-barrel membrane  
926 protein OmpA is synchronized and depends on membrane thickness. *Journal of Molecular Biology* 324, 319-330.  
927 10.1016/S0022-2836(02)01071-9.  
928
- 929 Kozjak, V., Wiedemann, N., Milenkovic, D., Lohaus, C., Meyer, H.E., Guiard, B., Meisinger, C., and Pfanner, N.  
930 (2003). An essential role of Sam50 in the protein sorting and assembly machinery of the mitochondrial outer  
931 membrane. *J Biol Chem* 278, 48520-48523. 10.1074/jbc.C300442200.  
932
- 933 Lauber, F., Deme, J.C., Lea, S.M., and Berks, B.C. (2018). Type 9 secretion system structures reveal a new protein  
934 transport mechanism. *Nature* 564, 77-82. 10.1038/s41586-018-0693-y.  
935
- 936 Lee, J., Sutterlin, H.A., Wzorek, J.S., Mandler, M.D., Hagan, C.L., Grabowicz, M., Tomasek, D., May, M.D., Hart,  
937 E.M., Silhavy, T.J., *et al.* (2018). Substrate binding to BamD triggers a conformational change in BamA to control  
938 membrane insertion. *Proc Natl Acad Sci U S A* 115, 2359-2364. 10.1073/pnas.1711727115.  
939
- 940 Lee, S.C., Knowles, T.J., Postis, V.L., Jamshad, M., Parslow, R.A., Lin, Y.P., Goldman, A., Sridhar, P., Overduin,  
941 M., Muench, S.P., *et al.* (2016). A method for detergent-free isolation of membrane proteins in their local lipid  
942 environment. *Nat Protoc* 11, 1149-1162. 10.1038/nprot.2016.070.  
943
- 944 Lessen, H.J., Fleming, P.J., Fleming, K.G., and Sodt, A.J. (2018). Building Blocks of the Outer Membrane:  
945 Calculating a General Elastic Energy Model for beta-Barrel Membrane Proteins. *J Chem Theory Comput* 14, 4487-  
946 4497. 10.1021/acs.jctc.8b00377.  
947
- 948 Leyton, D.L., Johnson, M.D., Thapa, R., Huysmans, G.H., Dunstan, R.A., Celik, N., Shen, H.H., Loo, D., Belousoff,  
949 M.J., Purcell, A.W., *et al.* (2014). A mortise-tenon joint in the transmembrane domain modulates autotransporter  
950 assembly into bacterial outer membranes. *Nat Commun* 5, 4239. 10.1038/ncomms5239.  
951
- 952 Liu, J., and Gumbart, J.C. (2020). Membrane thinning and lateral gating are consistent features of BamA across  
953 multiple species. *PLoS Comput Biol* 16, e1008355. 10.1371/journal.pcbi.1008355.  
954
- 955 Lomize, A.L., Pogozheva, I.D., and Mosberg, H.I. (2011). Anisotropic solvent model of the lipid bilayer. 2.  
956 Energetics of insertion of small molecules, peptides, and proteins in membranes. *J Chem Inf Model* 51, 930-946.  
957 10.1021/ci200020k.  
958
- 959 Lomize, M.A., Pogozheva, I.D., Joo, H., Mosberg, H.I., and Lomize, A.L. (2012). OPM database and PPM web  
960 server: resources for positioning of proteins in membranes. *Nucleic Acids Res* 40, D370-376. 10.1093/nar/gkr703.  
961
- 962 Lundquist, K., Bakelar, J., Noinaj, N., and Gumbart, J.C. (2018). C-terminal kink formation is required for lateral  
963 gating in BamA. *Proc Natl Acad Sci U S A* 115, E7942-E7949. 10.1073/pnas.1722530115.  
964
- 965 Noinaj, N., Kuszak, A.J., Balusek, C., Gumbart, J.C., and Buchanan, S.K. (2014). Lateral opening and exit pore  
966 formation are required for BamA function. *Structure* 22, 1055-1062. 10.1016/j.str.2014.05.008.  
967
- 968 Noinaj, N., Kuszak, A.J., and Buchanan, S.K. (2015). Heat Modifiability of Outer Membrane Proteins from Gram-  
969 Negative Bacteria. *Methods Mol Biol* 1329, 51-56. 10.1007/978-1-4939-2871-2\_4.  
970
- 971 Noinaj, N., Kuszak, A.J., Gumbart, J.C., Lukacik, P., Chang, H., Easley, N.C., Lithgow, T., and Buchanan, S.K.  
972 (2013). Structural insight into the biogenesis of beta-barrel membrane proteins. *Nature* 501, 385-390.  
973 10.1038/nature12521.  
974
- 975 Patel, R., Hsu, S.C., Bedard, J., Inoue, K., and Jarvis, P. (2008). The Omp85-related chloroplast outer envelope  
976 protein OEP80 is essential for viability in Arabidopsis. *Plant Physiol* 148, 235-245. 10.1104/pp.108.122754.  
977
- 978 Pavlova, O., Peterson, J.H., Ieva, R., and Bernstein, H.D. (2013). Mechanistic link between beta barrel assembly and  
979 the initiation of autotransporter secretion. *Proc Natl Acad Sci U S A* 110, E938-947. 10.1073/pnas.1219076110.  
980

- 981 Pettersen, E.F., Goddard, T.D., Huang, C.C., Couch, G.S., Greenblatt, D.M., Meng, E.C., and Ferrin, T.E. (2004).  
982 UCSF Chimera--a visualization system for exploratory research and analysis. *J Comput Chem* 25, 1605-1612.  
983 10.1002/jcc.20084.  
984
- 985 Pettersen, E.F., Goddard, T.D., Huang, C.C., Meng, E.C., Couch, G.S., Croll, T.I., Morris, J.H., and Ferrin, T.E.  
986 (2021). UCSF ChimeraX: Structure visualization for researchers, educators, and developers. *Protein Sci* 30, 70-82.  
987 10.1002/pro.3943.  
988
- 989 Prinz, W.A., and Hinshaw, J.E. (2009). Membrane-bending proteins. *Crit Rev Biochem Mol Biol* 44, 278-291.  
990 10.1080/10409230903183472.  
991
- 992 Punjani, A., Rubinstein, J.L., Fleet, D.J., and Brubaker, M.A. (2017). cryoSPARC: algorithms for rapid  
993 unsupervised cryo-EM structure determination. *Nat Methods* 14, 290-296. 10.1038/nmeth.4169.  
994
- 995 Punjani, A., Zhang, H., and Fleet, D.J. (2020). Non-uniform refinement: adaptive regularization improves single-  
996 particle cryo-EM reconstruction. *Nat Methods* 17, 1214-1221. 10.1038/s41592-020-00990-8.  
997
- 998 Rassam, P., Copeland, N.A., Birkholz, O., Toth, C., Chavent, M., Duncan, A.L., Cross, S.J., Housden, N.G.,  
999 Kaminska, R., Seger, U., *et al.* (2015). Supramolecular assemblies underpin turnover of outer membrane proteins in  
1000 bacteria. *Nature* 523, 333-336. 10.1038/nature14461.  
1001
- 1002 Remaut, H., and Waksman, G. (2006). Protein-protein interaction through beta-strand addition. *Trends Biochem Sci*  
1003 31, 436-444. 10.1016/j.tibs.2006.06.007.  
1004
- 1005 Rohou, A., and Grigorieff, N. (2015). CTFIND4: Fast and accurate defocus estimation from electron micrographs.  
1006 *J Struct Biol* 192, 216-221. 10.1016/j.jsb.2015.08.008.  
1007
- 1008 Rojas, E.R., Billings, G., Odermatt, P.D., Auer, G.K., Zhu, L., Miguel, A., Chang, F., Weibel, D.B., Theriot, J.A.,  
1009 and Huang, K.C. (2018). The outer membrane is an essential load-bearing element in Gram-negative bacteria.  
1010 *Nature* 559, 617-621. 10.1038/s41586-018-0344-3.  
1011
- 1012 Rossiter, A.E., Leyton, D.L., Tveen-Jensen, K., Browning, D.F., Sevastyanovich, Y., Knowles, T.J., Nichols, K.B.,  
1013 Cunningham, A.F., Overduin, M., Schembri, M.A., *et al.* (2011). The essential beta-barrel assembly machinery  
1014 complex components BamD and BamA are required for autotransporter biogenesis. *J Bacteriol* 193, 4250-4253.  
1015 10.1128/JB.00192-11.  
1016
- 1017 Schiffrin, B., Calabrese, A.N., Higgins, A.J., Humes, J.R., Ashcroft, A.E., Kalli, A.C., Brockwell, D.J., and Radford,  
1018 S.E. (2017). Effects of Periplasmic Chaperones and Membrane Thickness on BamA-Catalyzed Outer-Membrane  
1019 Protein Folding. *J Mol Biol* 429, 3776-3792. 10.1016/j.jmb.2017.09.008.  
1020
- 1021 Schulz, G.E. (2000). beta-Barrel membrane proteins. *Curr Opin Struct Biol* 10, 443-447. 10.1016/s0959-  
1022 440x(00)00120-2.  
1023
- 1024 Struyve, M., Moons, M., and Tommassen, J. (1991). Carboxy-Terminal Phenylalanine Is Essential for the Correct  
1025 Assembly of a Bacterial Outer-Membrane Protein. *Journal of Molecular Biology* 218, 141-148. Doi 10.1016/0022-  
1026 2836(91)90880-F.  
1027
- 1028 Sun, C., Benlekbir, S., Venkatakrisnan, P., Wang, Y., Hong, S., Hosler, J., Tajkhorshid, E., Rubinstein, J.L., and  
1029 Gennis, R.B. (2018). Structure of the alternative complex III in a supercomplex with cytochrome oxidase. *Nature*  
1030 557, 123-126. 10.1038/s41586-018-0061-y.  
1031
- 1032 Tomasek, D., and Kahne, D. (2021). The assembly of beta-barrel outer membrane proteins. *Curr Opin Microbiol* 60,  
1033 16-23. 10.1016/j.mib.2021.01.009.  
1034
- 1035 Tomasek, D., Rawson, S., Lee, J., Wzorek, J.S., Harrison, S.C., Li, Z., and Kahne, D. (2020). Structure of a nascent  
1036 membrane protein as it folds on the BAM complex. *Nature*. 10.1038/s41586-020-2370-1.

1037  
1038 Ursell, T.S., Trepagnier, E.H., Huang, K.C., and Theriot, J.A. (2012). Analysis of surface protein expression reveals  
1039 the growth pattern of the gram-negative outer membrane. *PLoS Comput Biol* 8, e1002680.  
1040 10.1371/journal.pcbi.1002680.  
1041  
1042 Voulhoux, R., Bos, M.P., Geurtsen, J., Mols, M., and Tommassen, J. (2003). Role of a highly conserved bacterial  
1043 protein in outer membrane protein assembly. *Science* 299, 262-265. 10.1126/science.1078973.  
1044  
1045 Wang, R.Y., Song, Y., Barad, B.A., Cheng, Y., Fraser, J.S., and DiMaio, F. (2016). Automated structure refinement  
1046 of macromolecular assemblies from cryo-EM maps using Rosetta. *Elife* 5. 10.7554/eLife.17219.  
1047  
1048 Wang, X., Peterson, J.H., and Bernstein, H.D. (2021). Bacterial Outer Membrane Proteins Are Targeted to the Bam  
1049 Complex by Two Parallel Mechanisms. *mBio* 12. 10.1128/mBio.00597-21.  
1050  
1051 Weiss, M.S., Wacker, T., Weckesser, J., Welte, W., and Schulz, G.E. (1990). The three-dimensional structure of  
1052 porin from *Rhodobacter capsulatus* at 3 Å resolution. *FEBS Lett* 267, 268-272. 10.1016/0014-5793(90)80942-c.  
1053  
1054 White, P., Haysom, S.F., Iadanza, M.G., Higgins, A.J., Machin, J.M., Whitehouse, J.M., Horne, J.E., Schiffrin, B.,  
1055 Carpenter-Platt, C., Calabrese, A.N., *et al.* (2021). The role of membrane destabilisation and protein dynamics in  
1056 BAM catalysed OMP folding. *Nat Commun* 12, 4174. 10.1038/s41467-021-24432-x.  
1057  
1058 Wu, E.L., Fleming, P.J., Yeom, M.S., Widmalm, G., Klauda, J.B., Fleming, K.G., and Im, W. (2014). E. coli outer  
1059 membrane and interactions with OmpLA. *Biophys J* 106, 2493-2502. 10.1016/j.bpj.2014.04.024.  
1060  
1061 Wu, T., Malinverni, J., Ruiz, N., Kim, S., Silhavy, T.J., and Kahne, D. (2005). Identification of a multicomponent  
1062 complex required for outer membrane biogenesis in *Escherichia coli*. *Cell* 121, 235-245. 10.1016/j.cell.2005.02.015.  
1063  
1064 Zheng, S.Q., Palovcak, E., Armache, J.P., Verba, K.A., Cheng, Y., and Agard, D.A. (2017). MotionCor2:  
1065 anisotropic correction of beam-induced motion for improved cryo-electron microscopy. *Nat Methods* 14, 331-332.  
1066 10.1038/nmeth.4193.  
1067  
1068 Zivanov, J., Nakane, T., Forsberg, B.O., Kimanius, D., Hagen, W.J., Lindahl, E., and Scheres, S.H. (2018). New  
1069 tools for automated high-resolution cryo-EM structure determination in RELION-3. *Elife* 7. 10.7554/eLife.42166.  
1070  
1071
